# Supplementary material for: Screening the Cancer Genome Atlas Database for Genes of Prognostic Value in Acute Myeloid Leukemia
Source: Front Oncol. 2020 Jan 21;9:1509. doi: 10.3389/fonc.2019.01509 (PMC6990132; doi:10.3389/fonc.2019.01509)
Supplement: Supplementary Table 3 — DEGs based on stromal score group. [file Table_3.XLSX]

## Sheet: stromal score group 
row.names(tT)	logFC	AveExpr	t	P.Value	adj.P.Val	B	regulated
WDR93	1.243	3.17937	7.55329	2.4e-12	1.72e-10	17.6192	Up-Regulated
LOC646851	1.4237	5.61587	7.0351	4.53e-11	2.5e-09	14.7599	Up-Regulated
FAHD2B	1.02852	5.72083	6.96282	6.76e-11	3.59e-09	14.3697	Up-Regulated
FAM86B2	1.33409	1.42902	6.78462	1.8e-10	8.6e-09	13.4174	Up-Regulated
SC65	1.03335	5.76277	6.383	1.56e-09	5.94e-08	11.324	Up-Regulated
C6orf225	1.10571	4.878	6.17376	4.66e-09	1.53e-07	10.2643	Up-Regulated
TMEM67	1.22021	6.93344	6.03214	9.65e-09	2.86e-07	9.55975	Up-Regulated
BIVM	1.14011	8.88435	5.98379	1.23e-08	3.54e-07	9.32163	Up-Regulated
ARMC9	1.25084	5.05928	5.95083	1.46e-08	4.11e-07	9.16004	Up-Regulated
NAT8L	1.46898	3.54149	5.90158	1.87e-08	5.11e-07	8.91962	Up-Regulated
TTC8	1.1748	6.86184	5.8896	1.99e-08	5.38e-07	8.86131	Up-Regulated
MRC2	1.76247	8.77257	5.79971	3.12e-08	7.91e-07	8.42651	Up-Regulated
DOCK3	1.36916	5.16287	5.73544	4.29e-08	1.05e-06	8.11838	Up-Regulated
ACP6	1.30664	7.40855	5.72857	4.44e-08	1.08e-06	8.08559	Up-Regulated
TYRO3	1.46734	4.61715	5.6991	5.13e-08	1.22e-06	7.94521	Up-Regulated
REEP2	1.07975	1.94799	5.68692	5.45e-08	1.29e-06	7.88732	Up-Regulated
ADAM22	1.52795	4.8662	5.67797	5.7e-08	1.34e-06	7.84484	Up-Regulated
ZNF114	1.18059	4.87598	5.64502	6.7e-08	1.53e-06	7.68885	Up-Regulated
SOHLH2	1.50986	4.35649	5.6207	7.55e-08	1.71e-06	7.5741	Up-Regulated
SGK2	1.0019	4.15883	5.59144	8.7e-08	1.94e-06	7.43651	Up-Regulated
C13orf38	1.17342	4.86855	5.56817	9.75e-08	2.12e-06	7.32742	Up-Regulated
PLEKHG4	1.14722	8.04854	5.56407	9.94e-08	2.16e-06	7.30825	Up-Regulated
MEX3B	1.13783	8.55796	5.55896	1.02e-07	2.21e-06	7.28432	Up-Regulated
RIMKLA	1.01495	4.63159	5.49672	1.38e-07	2.89e-06	6.99448	Up-Regulated
EMID1	1.54511	8.6743	5.48517	1.46e-07	3.05e-06	6.94093	Up-Regulated
C9orf43	1.36637	5.9363	5.45873	1.65e-07	3.39e-06	6.81863	Up-Regulated
DNMT3B	1.07867	9.13467	5.44897	1.73e-07	3.53e-06	6.77361	Up-Regulated
CDH24	1.0917	6.30899	5.44778	1.74e-07	3.54e-06	6.76815	Up-Regulated
RGS9BP	1.33834	3.59502	5.42905	1.91e-07	3.85e-06	6.68191	Up-Regulated
PRSSL1	1.35869	10.9333	5.41851	2e-07	4.04e-06	6.63346	Up-Regulated
EFCAB6	1.09072	2.24972	5.40312	2.16e-07	4.29e-06	6.56285	Up-Regulated
FAM86B1	1.08889	5.21561	5.29437	3.61e-07	6.73e-06	6.06796	Up-Regulated
RAC3	1.0554	5.43887	5.23869	4.69e-07	8.49e-06	5.81734	Up-Regulated
CMBL	1.10547	8.18954	5.22133	5.08e-07	9.11e-06	5.73963	Up-Regulated
CCDC24	1.02194	5.0032	5.21603	5.21e-07	9.3e-06	5.7159	Up-Regulated
NPAS1	1.10553	2.78782	5.19831	5.66e-07	9.98e-06	5.63682	Up-Regulated
DOK4	1.078	6.50526	5.09738	9.01e-07	1.46e-05	5.19001	Up-Regulated
CEACAM19	1.56397	5.31499	5.06953	1.02e-06	1.62e-05	5.06783	Up-Regulated
PCSK4	1.10391	5.50184	5.01277	1.33e-06	2.02e-05	4.82039	Up-Regulated
GCAT	1.03385	6.36001	5.01233	1.33e-06	2.02e-05	4.81847	Up-Regulated
KLHL31	1.07292	3.69169	4.99092	1.46e-06	2.2e-05	4.7257	Up-Regulated
C17orf96	1.1481	4.45026	4.98958	1.47e-06	2.21e-05	4.7199	Up-Regulated
OBSCN	1.16901	9.80334	4.95685	1.71e-06	2.5e-05	4.57865	Up-Regulated
RHOBTB1	1.26569	7.56684	4.95631	1.71e-06	2.5e-05	4.5763	Up-Regulated
SUGT1P1	1.09398	4.07755	4.9539	1.73e-06	2.52e-05	4.56593	Up-Regulated
NPM2	1.36613	5.48177	4.95219	1.74e-06	2.54e-05	4.5586	Up-Regulated
GRID2IP	1.09087	2.59593	4.92656	1.96e-06	2.8e-05	4.44855	Up-Regulated
TRIM74	1.02698	3.32668	4.92518	1.97e-06	2.81e-05	4.44263	Up-Regulated
CES3	1.37799	3.82039	4.91509	2.06e-06	2.91e-05	4.39943	Up-Regulated
C20orf203	1.25492	5.11581	4.91228	2.08e-06	2.94e-05	4.38739	Up-Regulated
ADAM11	1.03298	4.84196	4.87831	2.43e-06	3.34e-05	4.2425	Up-Regulated
LTBP4	1.01104	9.076	4.85921	2.64e-06	3.59e-05	4.16139	Up-Regulated
AMN	1.24177	5.30624	4.82539	3.07e-06	4.07e-05	4.01831	Up-Regulated
GPT2	1.03703	8.73216	4.82306	3.1e-06	4.1e-05	4.00849	Up-Regulated
DPY19L2P1	1.27093	3.2407	4.80915	3.29e-06	4.33e-05	3.94991	Up-Regulated
VWCE	1.15911	6.56325	4.80334	3.38e-06	4.43e-05	3.92548	Up-Regulated
IRX5	1.95152	3.05762	4.80087	3.42e-06	4.48e-05	3.91509	Up-Regulated
C10orf55	1.01056	3.60091	4.79857	3.45e-06	4.51e-05	3.9054	Up-Regulated
CDC42BPG	1.04359	5.81954	4.77403	3.85e-06	4.93e-05	3.8025	Up-Regulated
RTN4R	1.19083	7.22868	4.77152	3.89e-06	4.97e-05	3.79203	Up-Regulated
FANK1	1.12088	5.36109	4.76234	4.05e-06	5.16e-05	3.75362	Up-Regulated
MMP15	1.42849	5.71391	4.73908	4.48e-06	5.64e-05	3.65668	Up-Regulated
RAB38	1.14313	5.66723	4.72779	4.71e-06	5.87e-05	3.60972	Up-Regulated
EDA2R	1.37596	6.32429	4.72731	4.72e-06	5.87e-05	3.60772	Up-Regulated
DYX1C1	1.04843	4.74903	4.71235	5.03e-06	6.2e-05	3.54568	Up-Regulated
PLXNB1	1.2751	7.76407	4.68745	5.61e-06	6.79e-05	3.44271	Up-Regulated
DKFZP434L187	1.46219	4.41066	4.67044	6.03e-06	7.25e-05	3.37263	Up-Regulated
GOLGA8B	1.23947	9.6454	4.66358	6.22e-06	7.42e-05	3.34442	Up-Regulated
DYTN	1.37028	4.31433	4.66214	6.25e-06	7.45e-05	3.3385	Up-Regulated
CABLES1	1.15666	7.35691	4.64519	6.73e-06	7.94e-05	3.26895	Up-Regulated
SPTLC3	1.46741	5.85682	4.63469	7.04e-06	8.25e-05	3.22595	Up-Regulated
ESYT3	1.03982	3.55583	4.60411	8.03e-06	9.27e-05	3.10116	Up-Regulated
NEK5	1.00355	2.65781	4.58782	8.6e-06	9.8e-05	3.03496	Up-Regulated
GOLGA8A	1.07812	11.0081	4.57992	8.9e-06	0.000101	3.00293	Up-Regulated
KIAA0895	1.01457	5.66393	4.56981	9.29e-06	0.000104	2.96201	Up-Regulated
ACSM3	1.02869	7.93268	4.55351	9.96e-06	0.00011	2.89613	Up-Regulated
CCDC113	1.06207	4.77083	4.54641	1.03e-05	0.000113	2.8675	Up-Regulated
C19orf51	1.5775	3.78403	4.51389	1.18e-05	0.000127	2.73683	Up-Regulated
CCDC40	1.14732	3.01125	4.4863	1.32e-05	0.00014	2.62654	Up-Regulated
ACCN2	1.31865	4.11072	4.45022	1.54e-05	0.000159	2.48311	Up-Regulated
SARDH	1.12776	5.67167	4.43183	1.66e-05	0.000169	2.41037	Up-Regulated
DUSP15	1.1413	1.81938	4.42699	1.69e-05	0.000172	2.39127	Up-Regulated
SLC29A2	1.10315	6.12538	4.42075	1.74e-05	0.000175	2.36665	Up-Regulated
NAALADL2	1.28075	3.1066	4.41897	1.75e-05	0.000176	2.35963	Up-Regulated
NPW	1.27567	5.88019	4.40001	1.89e-05	0.000188	2.28503	Up-Regulated
RHPN1	1.09306	8.61776	4.35019	2.33e-05	0.000224	2.09028	Up-Regulated
FAM92A1	1.06153	5.50141	4.34345	2.39e-05	0.000229	2.06408	Up-Regulated
ITPKA	1.11982	4.07834	4.34183	2.41e-05	0.000231	2.05779	Up-Regulated
FAM154B	1.06774	3.22137	4.33234	2.5e-05	0.000239	2.02092	Up-Regulated
NOTUM	1.14039	2.78772	4.32884	2.54e-05	0.000241	2.00737	Up-Regulated
KHDRBS3	1.44653	3.42432	4.31648	2.67e-05	0.000251	1.9595	Up-Regulated
DAPL1	1.195	1.64856	4.28974	2.98e-05	0.000274	1.85637	Up-Regulated
C10orf114	1.67397	4.95677	4.27285	3.19e-05	0.000291	1.79146	Up-Regulated
UNC13B	1.65702	6.16792	4.26834	3.25e-05	0.000295	1.77416	Up-Regulated
DUSP5P	1.28365	3.05272	4.26093	3.35e-05	0.000303	1.74579	Up-Regulated
FAM171A2	1.16474	4.21131	4.24237	3.61e-05	0.000323	1.67487	Up-Regulated
FUT6	1.17632	2.92305	4.16929	4.84e-05	0.000414	1.39813	Up-Regulated
SLMO1	1.12313	5.29054	4.14644	5.3e-05	0.000447	1.31239	Up-Regulated
CHD5	1.26023	5.05347	4.07744	6.95e-05	0.000563	1.05582	Up-Regulated
USP2	1.0339	3.4343	4.06138	7.4e-05	0.000593	0.99663	Up-Regulated
CTSF	1.0832	6.98313	4.0546	7.6e-05	0.000606	0.971694	Up-Regulated
GYG2	1.25897	4.37059	4.05078	7.71e-05	0.000613	0.957664	Up-Regulated
BEND6	1.68087	4.74859	4.04486	7.89e-05	0.000624	0.93593	Up-Regulated
WDR35	1.0636	8.62437	4.00152	9.34e-05	0.000719	0.777635	Up-Regulated
DOC2A	1.12499	6.05105	3.99936	9.42e-05	0.000724	0.769792	Up-Regulated
PTGER1	1.07325	2.66683	3.97318	0.000104	0.000788	0.674891	Up-Regulated
WT1	1.36312	7.10149	3.94372	0.000117	0.000867	0.568734	Up-Regulated
LAPTM4B	1.17983	8.88626	3.93838	0.000119	0.00088	0.549563	Up-Regulated
MEX3A	1.25192	5.80365	3.93109	0.000122	0.0009	0.523436	Up-Regulated
GATSL2	1.40557	3.02659	3.93047	0.000123	0.000902	0.521222	Up-Regulated
FLG	1.25504	4.26371	3.89807	0.000139	0.000999	0.405554	Up-Regulated
SEMA3F	1.05018	3.50533	3.89475	0.000141	0.001009	0.393735	Up-Regulated
MATN4	1.34638	1.85297	3.8815	0.000148	0.001052	0.346696	Up-Regulated
FGF17	1.07202	4.43996	3.87498	0.000151	0.001074	0.323615	Up-Regulated
BCAM	1.12873	5.29677	3.87115	0.000154	0.001088	0.310075	Up-Regulated
SLC29A4	1.02697	3.66389	3.82952	0.00018	0.001237	0.163491	Up-Regulated
ZNF334	1.53669	5.87299	3.81119	0.000192	0.001307	0.09937	Up-Regulated
SPATA6	1.14954	5.03194	3.78514	0.000212	0.001412	0.008688	Up-Regulated
NTNG2	1.26326	8.42033	3.78453	0.000212	0.001414	0.006573	Up-Regulated
C14orf37	1.06647	3.34079	3.75676	0.000235	0.001537	-0.08949	Up-Regulated
MDFI	1.55104	6.01154	3.75662	0.000236	0.001537	-0.08996	Up-Regulated
CCL1	1.26793	1.77641	3.75597	0.000236	0.00154	-0.09222	Up-Regulated
SRGAP3	1.1123	7.24025	3.75245	0.000239	0.001556	-0.10435	Up-Regulated
FLG2	1.00147	2.05128	3.7513	0.00024	0.00156	-0.10831	Up-Regulated
ARHGAP22	1.02899	7.26222	3.71378	0.000276	0.001758	-0.23698	Up-Regulated
PLS1	1.18405	5.66613	3.70762	0.000282	0.001793	-0.25802	Up-Regulated
MAP1A	1.01936	10.0285	3.69932	0.000291	0.001837	-0.28629	Up-Regulated
COL27A1	1.13062	3.0693	3.69624	0.000294	0.001856	-0.29678	Up-Regulated
OGDHL	1.23772	1.87296	3.67601	0.000316	0.001978	-0.36543	Up-Regulated
SLC5A5	1.0462	3.13671	3.67261	0.00032	0.001998	-0.37693	Up-Regulated
GATA2	1.02367	10.1766	3.66308	0.000332	0.002054	-0.40913	Up-Regulated
DPY19L2	1.24369	8.18498	3.6273	0.000377	0.002281	-0.52942	Up-Regulated
PHKA1	1.44434	4.60657	3.57702	0.000452	0.002644	-0.69669	Up-Regulated
EBF4	1.18832	3.07731	3.53424	0.000525	0.003004	-0.83747	Up-Regulated
CGREF1	1.00356	4.72907	3.50838	0.000575	0.003235	-0.92185	Up-Regulated
GRIK5	1.05953	8.84209	3.495	0.000603	0.003363	-0.96531	Up-Regulated
ADAMTS14	1.15515	6.26784	3.49104	0.000611	0.003401	-0.97811	Up-Regulated
ZNF711	1.70978	6.63466	3.47206	0.000653	0.003596	-1.03946	Up-Regulated
MDGA1	1.17398	6.92932	3.46601	0.000667	0.00366	-1.05895	Up-Regulated
WIT1	1.3792	6.15088	3.44616	0.000715	0.003881	-1.12266	Up-Regulated
SEZ6L2	1.04351	2.37641	3.4446	0.000719	0.003897	-1.12766	Up-Regulated
RANBP17	1.35622	4.77519	3.44424	0.000719	0.003898	-1.12881	Up-Regulated
TGM5	1.24317	3.03413	3.44212	0.000725	0.003921	-1.13559	Up-Regulated
INTU	1.26352	4.60015	3.42513	0.000769	0.004117	-1.18984	Up-Regulated
HSPA4L	1.22113	4.22955	3.42052	0.000781	0.004168	-1.2045	Up-Regulated
ADAMTSL2	1.01208	2.32602	3.38341	0.000887	0.004615	-1.32203	Up-Regulated
LOC374491	1.02636	1.83659	3.37474	0.000913	0.004728	-1.34934	Up-Regulated
OBSL1	1.10738	8.52268	3.36792	0.000935	0.004815	-1.37076	Up-Regulated
STK33	1.18143	3.11785	3.35794	0.000967	0.00496	-1.40204	Up-Regulated
DST	1.04819	9.00459	3.35362	0.000981	0.005018	-1.41555	Up-Regulated
COL2A1	1.32485	2.50203	3.3486	0.000998	0.005089	-1.43124	Up-Regulated
ANO7	1.23748	6.38988	3.31063	0.001134	0.005661	-1.54924	Up-Regulated
BMPR1B	1.19958	2.5216	3.30039	0.001174	0.005822	-1.58087	Up-Regulated
KDELC1	1.0743	5.00546	3.28646	0.00123	0.006044	-1.62373	Up-Regulated
MYCN	1.2919	7.37798	3.28549	0.001234	0.006059	-1.62673	Up-Regulated
SALL4	1.20908	3.76217	3.2544	0.001368	0.006594	-1.72181	Up-Regulated
CNNM1	1.32586	4.75377	3.20625	0.001604	0.007513	-1.86751	Up-Regulated
SAMD11	1.01802	4.43722	3.18437	0.001723	0.007981	-1.9331	Up-Regulated
C20orf200	1.54028	3.79523	3.14934	0.00193	0.008747	-2.03723	Up-Regulated
EPCAM	1.34186	3.95356	3.14767	0.00194	0.008787	-2.04218	Up-Regulated
DPP10	1.4491	2.34162	3.13278	0.002036	0.009134	-2.08613	Up-Regulated
ZSCAN23	1.13153	4.44888	3.11994	0.002122	0.009437	-2.12386	Up-Regulated
PALM	1.07775	7.02613	3.11733	0.00214	0.0095	-2.13153	Up-Regulated
CCNA1	1.27683	8.17765	3.08666	0.00236	0.010312	-2.22105	Up-Regulated
MMP2	1.30433	8.33724	3.08372	0.002382	0.010384	-2.22959	Up-Regulated
GLB1L2	1.07265	3.97516	3.07033	0.002486	0.010753	-2.2684	Up-Regulated
COL4A5	2.01176	6.22159	3.06814	0.002503	0.01081	-2.27471	Up-Regulated
TOM1L1	1.2204	3.98289	3.06537	0.002525	0.010891	-2.28272	Up-Regulated
HOXA11AS	1.12762	2.2785	3.02992	0.002824	0.011941	-2.38456	Up-Regulated
ALOX12P2	1.14268	4.99519	3.02191	0.002896	0.012183	-2.40744	Up-Regulated
C10orf140	1.18707	5.72058	3.01338	0.002974	0.012446	-2.43174	Up-Regulated
PCBP3	1.28419	4.5547	2.9879	0.00322	0.013313	-2.50392	Up-Regulated
CACHD1	1.03994	4.98582	2.9778	0.003323	0.013657	-2.53238	Up-Regulated
C21orf56	1.00098	6.80691	2.94572	0.003669	0.014824	-2.62221	Up-Regulated
IRX3	1.46626	4.48559	2.91887	0.003983	0.01586	-2.69674	Up-Regulated
LPPR3	1.03896	9.04049	2.91332	0.004051	0.016075	-2.71205	Up-Regulated
CLEC11A	1.01052	10.8984	2.85603	0.004819	0.018557	-2.86871	Up-Regulated
KRT8	1.0991	5.57236	2.8452	0.004978	0.019031	-2.89801	Up-Regulated
PRDM16	1.66695	5.12297	2.83513	0.00513	0.019468	-2.92516	Up-Regulated
KIAA0087	1.13035	2.82839	2.81537	0.005441	0.020437	-2.97816	Up-Regulated
IGFBP2	1.13345	8.08568	2.79375	0.005801	0.021522	-3.03578	Up-Regulated
TRO	1.12137	5.33949	2.75009	0.006596	0.023897	-3.15091	Up-Regulated
NGFRAP1	1.06212	6.862	2.7456	0.006683	0.024149	-3.16265	Up-Regulated
FLJ42875	1.259	2.9343	2.68375	0.007992	0.027687	-3.32265	Up-Regulated
IL17RE	1.04994	6.20327	2.65386	0.008704	0.029703	-3.39878	Up-Regulated
MAMDC2	1.15232	7.73262	2.64172	0.009009	0.030512	-3.42947	Up-Regulated
SLITRK4	1.21341	6.76571	2.5989	0.010165	0.033708	-3.53669	Up-Regulated
NLRP2	1.08403	5.76301	2.58997	0.010422	0.034443	-3.55886	Up-Regulated
NXF3	1.13134	5.37609	2.54692	0.011745	0.03787	-3.6647	Up-Regulated
COL23A1	1.0219	6.31711	2.5185	0.012699	0.040283	-3.73367	Up-Regulated
SNCAIP	1.04382	2.46839	2.50951	0.013015	0.041094	-3.75533	Up-Regulated
KRT18	1.20003	6.72842	2.5055	0.013158	0.041475	-3.76495	Up-Regulated
UGT3A2	1.20249	4.59736	2.48024	0.014092	0.043834	-3.82536	Up-Regulated
HOXA4	1.10086	5.4417	2.45411	0.01512	0.046359	-3.88726	Up-Regulated
HOXA6	1.27621	5.2596	2.43731	0.015816	0.048061	-3.92672	Up-Regulated
LRP1	-3.91322	10.5475	-13.2264	5.34e-28	1.1e-23	52.8527	Down-Regulated
CHST15	-3.17197	8.19139	-12.6795	1.96e-26	2.02e-22	49.3281	Down-Regulated
SLC7A7	-3.27968	8.29805	-12.5816	3.74e-26	2.56e-22	48.697	Down-Regulated
KCTD12	-3.17293	9.95039	-12.1522	6.33e-25	3.25e-21	45.9312	Down-Regulated
TLR7	-3.32556	6.85217	-12.0863	9.77e-25	4.01e-21	45.5066	Down-Regulated
IGSF6	-2.28152	7.83689	-12.03	1.41e-24	4.84e-21	45.1449	Down-Regulated
VCAN	-4.23195	11.8348	-11.8101	6e-24	1.76e-20	43.7314	Down-Regulated
CYBB	-3.0851	11.5748	-11.6047	2.31e-23	5.92e-20	42.4132	Down-Regulated
CLEC1A	-2.30213	2.24742	-11.5513	3.28e-23	7.48e-20	42.0704	Down-Regulated
IL10RA	-2.03909	10.1882	-11.5231	3.94e-23	8.09e-20	41.8897	Down-Regulated
SIGLEC9	-3.32262	6.70041	-11.502	4.52e-23	8.28e-20	41.7548	Down-Regulated
CXCL16	-2.69886	6.48038	-11.4917	4.84e-23	8.28e-20	41.6889	Down-Regulated
CD14	-4.13417	8.08134	-11.448	6.44e-23	1.02e-19	41.4087	Down-Regulated
SGK1	-2.43997	8.04266	-11.4349	7.02e-23	1.03e-19	41.3247	Down-Regulated
CECR1	-1.92395	12.0225	-11.4036	8.62e-23	1.18e-19	41.1244	Down-Regulated
OSBPL11	-1.03981	9.28473	-11.2938	1.77e-22	2.27e-19	40.4224	Down-Regulated
LRRK2	-3.28153	8.08301	-11.1927	3.42e-22	4.13e-19	39.7764	Down-Regulated
CLEC4A	-2.74376	6.17951	-11.169	3.99e-22	4.38e-19	39.6249	Down-Regulated
RBM47	-3.0865	8.47799	-11.1642	4.12e-22	4.38e-19	39.5944	Down-Regulated
CYP1B1	-3.45852	6.91948	-11.1586	4.27e-22	4.38e-19	39.5584	Down-Regulated
GPR65	-1.86976	7.38687	-11.0724	7.49e-22	7.32e-19	39.0091	Down-Regulated
CTSS	-1.82682	12.4029	-11.0557	8.35e-22	7.79e-19	38.9026	Down-Regulated
HMOX1	-2.67017	7.61274	-10.9659	1.5e-21	1.34e-18	38.3308	Down-Regulated
MYCL1	-3.55705	4.99045	-10.9029	2.26e-21	1.93e-18	37.9299	Down-Regulated
SLC15A3	-3.015	6.69914	-10.7911	4.66e-21	3.75e-18	37.2198	Down-Regulated
ARHGEF10L	-4.21284	5.83945	-10.7882	4.75e-21	3.75e-18	37.2009	Down-Regulated
CCR2	-3.09373	8.38363	-10.7238	7.21e-21	5.48e-18	36.7927	Down-Regulated
RBP7	-2.62332	2.56151	-10.6869	9.16e-21	6.72e-18	36.5587	Down-Regulated
PSAP	-1.39907	13.9422	-10.6538	1.14e-20	8.04e-18	36.3489	Down-Regulated
TNFSF10	-1.75322	9.26137	-10.6463	1.19e-20	8.16e-18	36.3013	Down-Regulated
MEFV	-3.55859	7.11906	-10.6249	1.37e-20	9.06e-18	36.1658	Down-Regulated
MS4A4A	-3.33419	6.15781	-10.6015	1.59e-20	1.02e-17	36.0178	Down-Regulated
CCR1	-2.61529	8.44498	-10.595	1.66e-20	1.03e-17	35.977	Down-Regulated
FGL2	-2.69181	10.2189	-10.5656	2.01e-20	1.16e-17	35.7908	Down-Regulated
2019-03-01	-1.89836	7.94632	-10.5646	2.02e-20	1.16e-17	35.7845	Down-Regulated
STX11	-1.89141	9.22659	-10.5634	2.04e-20	1.16e-17	35.777	Down-Regulated
LY96	-2.47664	5.19986	-10.5323	2.49e-20	1.38e-17	35.5807	Down-Regulated
MAFB	-3.38423	7.92392	-10.524	2.63e-20	1.42e-17	35.5284	Down-Regulated
MPEG1	-3.51456	10.9961	-10.515	2.78e-20	1.47e-17	35.471	Down-Regulated
CCR5	-2.36344	6.70925	-10.5061	2.95e-20	1.51e-17	35.4147	Down-Regulated
ACVRL1	-2.70094	4.03174	-10.5007	3.05e-20	1.53e-17	35.3809	Down-Regulated
CD101	-2.58279	6.7188	-10.4643	3.86e-20	1.87e-17	35.1514	Down-Regulated
TLR8	-3.82081	7.72492	-10.4624	3.91e-20	1.87e-17	35.139	Down-Regulated
FCN1	-3.50535	9.47659	-10.448	4.29e-20	2e-17	35.0481	Down-Regulated
GIMAP4	-2.40968	8.17945	-10.4284	4.87e-20	2.22e-17	34.9244	Down-Regulated
CD1D	-3.29665	7.16634	-10.3876	6.33e-20	2.82e-17	34.6675	Down-Regulated
LILRA5	-3.91835	6.23382	-10.3194	9.82e-20	4.29e-17	34.2383	Down-Regulated
RGS2	-2.32517	9.38273	-10.2526	1.51e-19	6.45e-17	33.8179	Down-Regulated
MS4A6A	-3.28443	9.51427	-10.2482	1.55e-19	6.5e-17	33.7904	Down-Regulated
ADAP2	-2.48728	7.35264	-10.2449	1.58e-19	6.51e-17	33.7695	Down-Regulated
HFE	-2.01295	3.67476	-10.2188	1.87e-19	7.54e-17	33.6061	Down-Regulated
SIGLEC1	-3.64779	5.80531	-10.2101	1.98e-19	7.82e-17	33.551	Down-Regulated
S100A9	-4.01499	10.817	-10.1966	2.16e-19	8.37e-17	33.4665	Down-Regulated
CD300E	-4.0335	4.86001	-10.1724	2.52e-19	9.51e-17	33.315	Down-Regulated
GPBAR1	-2.26464	6.07454	-10.1709	2.55e-19	9.51e-17	33.3054	Down-Regulated
C5AR1	-3.28595	8.32553	-10.1651	2.64e-19	9.55e-17	33.269	Down-Regulated
S100A8	-4.02004	10.3052	-10.1646	2.65e-19	9.55e-17	33.2658	Down-Regulated
SULF2	-2.5448	8.56467	-10.1182	3.57e-19	1.25e-16	32.9753	Down-Regulated
C9orf72	-1.28835	9.71343	-10.1172	3.59e-19	1.25e-16	32.9686	Down-Regulated
MSR1	-3.56708	4.64021	-10.1116	3.72e-19	1.27e-16	32.934	Down-Regulated
LILRB1	-2.40423	8.13653	-10.1045	3.9e-19	1.31e-16	32.8891	Down-Regulated
FGD2	-2.59857	8.99178	-10.0972	4.08e-19	1.35e-16	32.8436	Down-Regulated
GIMAP8	-2.3083	7.83908	-10.0837	4.45e-19	1.45e-16	32.7589	Down-Regulated
TMEM132A	-2.11411	3.6641	-10.0361	6.03e-19	1.94e-16	32.4615	Down-Regulated
IFI30	-2.76667	10.1334	-10.0306	6.25e-19	1.97e-16	32.4269	Down-Regulated
CLEC10A	-3.84809	4.4066	-10.0155	6.88e-19	2.14e-16	32.3329	Down-Regulated
TGFBI	-3.3326	7.05583	-10.0013	7.54e-19	2.31e-16	32.2442	Down-Regulated
CRISPLD2	-2.73676	7.03537	-9.90467	1.4e-18	4.15e-16	31.6414	Down-Regulated
FPR1	-3.35498	7.43043	-9.8807	1.63e-18	4.7e-16	31.4921	Down-Regulated
SLC6A12	-2.9041	3.28603	-9.81571	2.46e-18	7.01e-16	31.0879	Down-Regulated
C20orf118	-1.94678	7.42788	-9.79573	2.79e-18	7.85e-16	30.9638	Down-Regulated
SLC37A2	-2.34636	7.16413	-9.78694	2.95e-18	8.19e-16	30.9092	Down-Regulated
RCN3	-2.25205	5.74627	-9.76624	3.36e-18	9.21e-16	30.7807	Down-Regulated
SIRPB1	-2.2739	9.37455	-9.72732	4.31e-18	1.16e-15	30.5393	Down-Regulated
NLRP12	-3.0422	7.33598	-9.70939	4.83e-18	1.29e-15	30.4281	Down-Regulated
NCF2	-2.45298	10.0947	-9.67632	5.95e-18	1.55e-15	30.2233	Down-Regulated
POU2F2	-1.6825	10.4621	-9.64197	7.39e-18	1.9e-15	30.0108	Down-Regulated
AMICA1	-2.62589	9.0622	-9.63032	7.96e-18	2.02e-15	29.9387	Down-Regulated
UNC5A	-2.66036	3.57811	-9.61852	8.57e-18	2.15e-15	29.8658	Down-Regulated
S100A12	-4.1255	6.7039	-9.61397	8.82e-18	2.18e-15	29.8377	Down-Regulated
SIGLEC7	-2.75701	5.83335	-9.59458	9.97e-18	2.44e-15	29.7179	Down-Regulated
PTPRJ	-1.79635	10.227	-9.58658	1.05e-17	2.53e-15	29.6686	Down-Regulated
SIRPD	-2.59713	3.37877	-9.54562	1.36e-17	3.24e-15	29.4159	Down-Regulated
SLC16A6	-2.05526	4.29749	-9.53289	1.47e-17	3.46e-15	29.3374	Down-Regulated
CR1	-2.8378	8.99245	-9.53187	1.48e-17	3.46e-15	29.3311	Down-Regulated
ASGR2	-3.1748	4.85552	-9.51532	1.64e-17	3.79e-15	29.2291	Down-Regulated
C1orf38	-1.26382	10.7936	-9.47775	2.08e-17	4.75e-15	28.9978	Down-Regulated
C17orf87	-2.16547	6.7509	-9.47446	2.13e-17	4.8e-15	28.9776	Down-Regulated
KIAA0513	-1.7938	9.00047	-9.45828	2.35e-17	5.25e-15	28.8781	Down-Regulated
PLBD1	-3.8936	7.29942	-9.39063	3.6e-17	7.87e-15	28.4626	Down-Regulated
CLEC7A	-2.98962	7.74015	-9.38837	3.65e-17	7.89e-15	28.4487	Down-Regulated
S1PR3	-2.86372	6.20417	-9.38229	3.79e-17	8.12e-15	28.4113	Down-Regulated
FCGRT	-1.79845	10.0954	-9.37579	3.95e-17	8.37e-15	28.3715	Down-Regulated
MEGF9	-1.43029	10.7218	-9.36564	4.21e-17	8.82e-15	28.3093	Down-Regulated
LILRA6	-3.24278	7.5916	-9.34322	4.85e-17	9.9e-15	28.1719	Down-Regulated
CARD14	-1.7921	3.72787	-9.34253	4.87e-17	9.9e-15	28.1677	Down-Regulated
SLC11A1	-2.90014	8.67358	-9.32031	5.6e-17	1.13e-14	28.0316	Down-Regulated
ARHGAP24	-2.10772	5.80656	-9.24737	8.83e-17	1.76e-14	27.5857	Down-Regulated
MTMR11	-3.014	5.39227	-9.23715	9.41e-17	1.86e-14	27.5233	Down-Regulated
SAMHD1	-2.14428	11.4038	-9.23266	9.68e-17	1.89e-14	27.4959	Down-Regulated
ZNF366	-2.33638	3.53668	-9.21022	1.11e-16	2.14e-14	27.359	Down-Regulated
FCGR2A	-2.1504	9.93392	-9.19985	1.19e-16	2.25e-14	27.2958	Down-Regulated
JHDM1D	-1.35646	9.69219	-9.1992	1.19e-16	2.25e-14	27.2919	Down-Regulated
IQSEC1	-1.14962	10.7155	-9.18528	1.3e-16	2.43e-14	27.207	Down-Regulated
OGFRL1	-1.21168	8.90337	-9.15721	1.55e-16	2.87e-14	27.0361	Down-Regulated
MRVI1	-1.62293	6.34362	-9.14897	1.63e-16	2.99e-14	26.986	Down-Regulated
GIMAP1	-1.42381	7.11186	-9.14623	1.66e-16	3.01e-14	26.9693	Down-Regulated
MARCO	-3.43504	3.50153	-9.13789	1.75e-16	3.15e-14	26.9186	Down-Regulated
LRRC25	-2.50786	8.47906	-9.12169	1.93e-16	3.45e-14	26.8201	Down-Regulated
NLRC4	-1.94169	7.48824	-9.1188	1.97e-16	3.48e-14	26.8025	Down-Regulated
F5	-2.48003	6.86777	-9.11539	2.01e-16	3.53e-14	26.7818	Down-Regulated
ZMYND15	-1.95092	2.10689	-9.09451	2.29e-16	3.98e-14	26.655	Down-Regulated
RCBTB2	-1.10095	8.8608	-9.08739	2.39e-16	4.13e-14	26.6117	Down-Regulated
MYOF	-3.38532	7.49698	-9.07714	2.55e-16	4.36e-14	26.5496	Down-Regulated
NPL	-2.19657	6.81564	-9.06487	2.75e-16	4.66e-14	26.4751	Down-Regulated
TLR5	-2.70235	6.49361	-9.06365	2.77e-16	4.66e-14	26.4677	Down-Regulated
LYZ	-2.85374	15.1245	-9.03826	3.24e-16	5.41e-14	26.3138	Down-Regulated
CD163	-3.67579	7.87436	-9.03667	3.28e-16	5.42e-14	26.3042	Down-Regulated
LILRB4	-4.00708	6.8325	-9.01372	3.78e-16	6.2e-14	26.1652	Down-Regulated
AQP9	-3.43459	6.39062	-9.00495	3.99e-16	6.45e-14	26.1121	Down-Regulated
KMO	-1.24809	6.64013	-9.00493	3.99e-16	6.45e-14	26.112	Down-Regulated
SIGLEC16	-1.76718	4.58003	-9.00177	4.07e-16	6.52e-14	26.0929	Down-Regulated
TNFRSF1B	-1.92677	10.7662	-8.99491	4.24e-16	6.74e-14	26.0513	Down-Regulated
BCL6	-1.81374	9.55746	-8.99395	4.27e-16	6.74e-14	26.0455	Down-Regulated
SECTM1	-2.91312	6.45109	-8.97583	4.77e-16	7.48e-14	25.936	Down-Regulated
FCGR2B	-2.20443	5.85595	-8.95354	5.48e-16	8.52e-14	25.8013	Down-Regulated
ABI3	-2.00434	6.79478	-8.95204	5.53e-16	8.54e-14	25.7922	Down-Regulated
RGL1	-2.07273	5.07783	-8.94471	5.79e-16	8.87e-14	25.748	Down-Regulated
SDC3	-2.55618	5.83846	-8.93876	6e-16	9.13e-14	25.7121	Down-Regulated
CD86	-2.60601	8.01826	-8.92891	6.38e-16	9.63e-14	25.6526	Down-Regulated
CTSH	-1.99704	8.8035	-8.92489	6.54e-16	9.8e-14	25.6284	Down-Regulated
FCER1G	-2.03639	9.95321	-8.88528	8.35e-16	1.22e-13	25.3897	Down-Regulated
C4orf34	-1.42233	7.23355	-8.84272	1.09e-15	1.57e-13	25.1336	Down-Regulated
LILRB3	-2.59996	8.04682	-8.83366	1.15e-15	1.65e-13	25.0791	Down-Regulated
GLT1D1	-3.0195	4.45086	-8.80367	1.38e-15	1.97e-13	24.899	Down-Regulated
SGSH	-1.97202	7.99772	-8.79831	1.43e-15	2.02e-13	24.8668	Down-Regulated
COTL1	-1.30398	11.7892	-8.7906	1.5e-15	2.1e-13	24.8205	Down-Regulated
CD1A	-1.9792	1.96852	-8.7763	1.63e-15	2.28e-13	24.7348	Down-Regulated
C19orf38	-1.89185	7.53475	-8.74103	2.03e-15	2.79e-13	24.5235	Down-Regulated
SAMD4A	-1.85032	5.09012	-8.7384	2.06e-15	2.82e-13	24.5077	Down-Regulated
RPGRIP1	-1.95125	3.37834	-8.70964	2.46e-15	3.34e-13	24.3357	Down-Regulated
PTPRO	-2.19744	6.43386	-8.69852	2.63e-15	3.55e-13	24.2692	Down-Regulated
ST3GAL5	-1.27162	7.83449	-8.68469	2.86e-15	3.82e-13	24.1866	Down-Regulated
P2RY13	-2.29012	7.99787	-8.67563	3.02e-15	4.01e-13	24.1325	Down-Regulated
KCNK13	-1.91589	1.59227	-8.65339	3.46e-15	4.56e-13	23.9998	Down-Regulated
VNN3	-2.8272	4.20689	-8.64924	3.55e-15	4.65e-13	23.9751	Down-Regulated
CTSZ	-1.1648	11.075	-8.63111	3.97e-15	5.16e-13	23.867	Down-Regulated
FOLR2	-2.24742	3.51822	-8.62957	4.01e-15	5.17e-13	23.8578	Down-Regulated
LGALS3	-2.27084	7.82869	-8.61415	4.4e-15	5.65e-13	23.766	Down-Regulated
ITGAM	-1.95595	10.6416	-8.61045	4.5e-15	5.74e-13	23.744	Down-Regulated
PDK4	-2.88222	6.22868	-8.55008	6.5e-15	8.24e-13	23.3852	Down-Regulated
NOD2	-2.26307	8.04672	-8.54026	6.9e-15	8.69e-13	23.3268	Down-Regulated
APOBEC3A	-2.66056	6.34223	-8.53239	7.24e-15	9.06e-13	23.2802	Down-Regulated
FAM198B	-2.63111	8.60848	-8.52804	7.43e-15	9.25e-13	23.2544	Down-Regulated
RNASE6	-2.28116	8.80019	-8.50318	8.64e-15	1.07e-12	23.107	Down-Regulated
SLC26A11	-1.90894	5.31661	-8.49797	8.92e-15	1.1e-12	23.0762	Down-Regulated
EPHB2	-2.82184	3.40517	-8.48516	9.64e-15	1.17e-12	23.0004	Down-Regulated
OASL	-1.86078	5.23175	-8.476	1.02e-14	1.23e-12	22.9461	Down-Regulated
NUAK2	-1.66876	6.67524	-8.4564	1.15e-14	1.36e-12	22.8303	Down-Regulated
IL1RN	-2.69084	7.05054	-8.45303	1.17e-14	1.38e-12	22.8104	Down-Regulated
FCAR	-2.9094	6.79092	-8.44935	1.2e-14	1.4e-12	22.7886	Down-Regulated
OAS1	-1.49902	8.42909	-8.44506	1.23e-14	1.43e-12	22.7632	Down-Regulated
PRLR	-3.65343	5.07624	-8.44036	1.26e-14	1.47e-12	22.7355	Down-Regulated
CUEDC1	-2.02067	4.99682	-8.39477	1.67e-14	1.91e-12	22.4666	Down-Regulated
RNASE1	-2.39332	4.82028	-8.369	1.95e-14	2.21e-12	22.3148	Down-Regulated
SLC46A2	-1.56481	5.69675	-8.35259	2.15e-14	2.41e-12	22.2183	Down-Regulated
CTSB	-1.08151	12.4487	-8.33385	2.4e-14	2.67e-12	22.1081	Down-Regulated
HK3	-3.18247	8.28164	-8.32896	2.48e-14	2.73e-12	22.0794	Down-Regulated
LGALS2	-3.28592	3.99568	-8.32192	2.58e-14	2.84e-12	22.0381	Down-Regulated
HSPA6	-2.13329	6.53293	-8.30845	2.8e-14	3.04e-12	21.959	Down-Regulated
TMCC3	-1.58411	5.5403	-8.29967	2.95e-14	3.19e-12	21.9075	Down-Regulated
CMKLR1	-2.11938	6.22582	-8.29484	3.04e-14	3.27e-12	21.8792	Down-Regulated
CD48	-1.64272	9.41267	-8.29156	3.1e-14	3.31e-12	21.86	Down-Regulated
TBC1D9	-1.93704	7.19285	-8.28684	3.19e-14	3.39e-12	21.8323	Down-Regulated
C17orf44	-1.00856	5.81267	-8.28077	3.31e-14	3.5e-12	21.7968	Down-Regulated
FCGR2C	-2.33301	6.59783	-8.25279	3.91e-14	4.12e-12	21.6329	Down-Regulated
TICAM2	-2.47334	6.31813	-8.25078	3.96e-14	4.13e-12	21.6212	Down-Regulated
GLIPR2	-1.26504	10.0306	-8.24486	4.1e-14	4.25e-12	21.5865	Down-Regulated
ZCCHC24	-1.40772	7.34623	-8.24311	4.15e-14	4.28e-12	21.5763	Down-Regulated
ARHGAP31	-1.72492	7.95219	-8.2154	4.89e-14	5.02e-12	21.4144	Down-Regulated
LILRB5	-2.05094	3.83817	-8.20118	5.33e-14	5.44e-12	21.3314	Down-Regulated
IRF8	-2.27342	9.90478	-8.19389	5.57e-14	5.66e-12	21.2888	Down-Regulated
RNASE4	-1.67009	4.9876	-8.17932	6.07e-14	6.14e-12	21.2039	Down-Regulated
ZFP36L1	-1.55922	10.0367	-8.17458	6.25e-14	6.29e-12	21.1763	Down-Regulated
SERPINA1	-3.09794	10.247	-8.16646	6.56e-14	6.57e-12	21.1289	Down-Regulated
SIGLEC11	-2.18187	3.82645	-8.16097	6.77e-14	6.75e-12	21.097	Down-Regulated
CD68	-1.69243	11.3663	-8.1386	7.74e-14	7.64e-12	20.9668	Down-Regulated
NCF1	-2.52896	8.55323	-8.13401	7.96e-14	7.82e-12	20.9401	Down-Regulated
PILRA	-1.54658	8.44586	-8.12631	8.33e-14	8.14e-12	20.8954	Down-Regulated
TLR1	-1.20965	8.9464	-8.10307	9.57e-14	9.31e-12	20.7603	Down-Regulated
FYB	-1.044	11.8941	-8.09585	9.98e-14	9.67e-12	20.7185	Down-Regulated
VNN2	-2.37919	7.48273	-8.06753	1.18e-13	1.14e-11	20.5543	Down-Regulated
RAB39	-2.07626	3.71814	-8.06161	1.22e-13	1.17e-11	20.52	Down-Regulated
ASGR1	-1.68285	4.25246	-8.05814	1.25e-13	1.18e-11	20.4999	Down-Regulated
SYTL3	-1.44626	6.77263	-8.05269	1.29e-13	1.21e-11	20.4683	Down-Regulated
FPR2	-2.61459	6.06131	-8.03285	1.45e-13	1.35e-11	20.3535	Down-Regulated
RAB31	-2.1494	9.40329	-8.02492	1.52e-13	1.41e-11	20.3077	Down-Regulated
MNDA	-2.21038	10.8421	-8.02133	1.55e-13	1.44e-11	20.287	Down-Regulated
VSIG4	-2.47836	6.62477	-8.01458	1.62e-13	1.48e-11	20.248	Down-Regulated
RIN2	-1.93501	6.75034	-8.01432	1.62e-13	1.48e-11	20.2464	Down-Regulated
CD36	-2.38282	10.772	-8.01091	1.65e-13	1.5e-11	20.2267	Down-Regulated
FXYD6	-2.54937	6.20108	-7.99545	1.81e-13	1.64e-11	20.1375	Down-Regulated
TMPRSS13	-1.57543	4.10902	-7.99056	1.86e-13	1.67e-11	20.1093	Down-Regulated
CD1C	-2.64049	4.56061	-7.98998	1.87e-13	1.67e-11	20.106	Down-Regulated
PLD2	-1.85856	6.43199	-7.98118	1.97e-13	1.75e-11	20.0552	Down-Regulated
DTX4	-1.80092	7.47397	-7.9775	2.01e-13	1.78e-11	20.034	Down-Regulated
NAGA	-1.00672	10.542	-7.95873	2.25e-13	1.97e-11	19.9258	Down-Regulated
C1QA	-2.77027	5.71302	-7.9431	2.47e-13	2.15e-11	19.8359	Down-Regulated
CTSL1	-2.24214	6.61123	-7.94307	2.47e-13	2.15e-11	19.8357	Down-Regulated
ADORA3	-1.36846	5.18875	-7.93401	2.6e-13	2.26e-11	19.7836	Down-Regulated
NCF1C	-2.53168	6.92222	-7.90672	3.06e-13	2.64e-11	19.6268	Down-Regulated
LILRB2	-2.63409	8.7826	-7.89939	3.19e-13	2.73e-11	19.5847	Down-Regulated
HVCN1	-1.21791	9.04112	-7.88702	3.43e-13	2.92e-11	19.5138	Down-Regulated
IL31RA	-2.56351	2.67423	-7.87959	3.59e-13	3.04e-11	19.4712	Down-Regulated
FAM129B	-1.91034	8.56277	-7.87592	3.67e-13	3.1e-11	19.4501	Down-Regulated
SLC8A1	-2.54017	6.92459	-7.87392	3.71e-13	3.12e-11	19.4387	Down-Regulated
DAPP1	-1.06466	9.43823	-7.85714	4.09e-13	3.43e-11	19.3425	Down-Regulated
IL13RA1	-1.84882	9.65825	-7.85008	4.27e-13	3.55e-11	19.3021	Down-Regulated
KLF4	-2.33775	9.20205	-7.84932	4.28e-13	3.55e-11	19.2978	Down-Regulated
AIM1	-1.02085	11.1555	-7.84709	4.34e-13	3.58e-11	19.285	Down-Regulated
IL17RA	-1.39688	10.7222	-7.82744	4.87e-13	4e-11	19.1727	Down-Regulated
CD200R1	-1.83883	5.62794	-7.80621	5.52e-13	4.49e-11	19.0514	Down-Regulated
PID1	-2.17535	3.7511	-7.7864	6.19e-13	5.01e-11	18.9384	Down-Regulated
CSF2RA	-1.37316	8.92094	-7.76615	6.97e-13	5.59e-11	18.8231	Down-Regulated
PDE4A	-1.88103	6.7408	-7.73737	8.25e-13	6.54e-11	18.6593	Down-Regulated
SLC9A9	-1.74504	6.21647	-7.71393	9.45e-13	7.44e-11	18.5262	Down-Regulated
EMR3	-2.50285	4.61131	-7.70372	1e-12	7.85e-11	18.4683	Down-Regulated
SNTB2	-1.19121	7.47704	-7.69807	1.04e-12	8.06e-11	18.4363	Down-Regulated
IPCEF1	-1.60989	8.10298	-7.69278	1.07e-12	8.28e-11	18.4063	Down-Regulated
NLRP1	-1.26516	11.0631	-7.68278	1.13e-12	8.71e-11	18.3497	Down-Regulated
ZNF703	-2.02931	4.14749	-7.67188	1.21e-12	9.25e-11	18.2879	Down-Regulated
DPYD	-1.26374	10.0869	-7.66809	1.23e-12	9.42e-11	18.2664	Down-Regulated
CRTAM	-1.52391	4.58738	-7.65492	1.33e-12	1.01e-10	18.192	Down-Regulated
NFAM1	-2.32365	9.84209	-7.65446	1.34e-12	1.01e-10	18.1894	Down-Regulated
LY86	-2.46658	7.82848	-7.65204	1.35e-12	1.01e-10	18.1757	Down-Regulated
LOC388242	-1.39639	2.36243	-7.65159	1.36e-12	1.01e-10	18.1731	Down-Regulated
IL10	-2.23218	2.90573	-7.64993	1.37e-12	1.02e-10	18.1637	Down-Regulated
NCF1B	-2.12624	7.65943	-7.63201	1.52e-12	1.13e-10	18.0625	Down-Regulated
APOA2	-1.1421	1.21778	-7.62913	1.55e-12	1.14e-10	18.0462	Down-Regulated
FGR	-2.14497	10.5444	-7.6121	1.71e-12	1.25e-10	17.9502	Down-Regulated
IRF4	-1.45005	7.60309	-7.58037	2.05e-12	1.49e-10	17.7714	Down-Regulated
ADAM9	-1.43425	8.73316	-7.57785	2.08e-12	1.5e-10	17.7572	Down-Regulated
CACNA2D3	-2.74285	4.58157	-7.5716	2.16e-12	1.55e-10	17.7221	Down-Regulated
FFAR2	-2.27882	4.46037	-7.5457	2.51e-12	1.78e-10	17.5766	Down-Regulated
HSPA7	-2.39865	5.94118	-7.52138	2.88e-12	2.03e-10	17.4401	Down-Regulated
MS4A7	-1.7777	9.16322	-7.51956	2.91e-12	2.05e-10	17.4299	Down-Regulated
GNGT2	-1.52768	3.82173	-7.51503	2.99e-12	2.09e-10	17.4045	Down-Regulated
CKAP4	-1.74149	8.16435	-7.50701	3.13e-12	2.18e-10	17.3596	Down-Regulated
GUCY2C	-1.34044	1.29859	-7.48425	3.57e-12	2.47e-10	17.2322	Down-Regulated
ARHGAP29	-2.07805	3.30765	-7.47574	3.75e-12	2.58e-10	17.1847	Down-Regulated
CD300C	-1.98681	7.20499	-7.4581	4.15e-12	2.84e-10	17.0861	Down-Regulated
SCPEP1	-1.84587	9.80335	-7.43921	4.62e-12	3.14e-10	16.9808	Down-Regulated
C19orf59	-2.11861	6.97783	-7.4343	4.75e-12	3.22e-10	16.9534	Down-Regulated
PTAFR	-1.93295	8.69599	-7.43207	4.81e-12	3.25e-10	16.9409	Down-Regulated
CD209	-2.22863	3.22432	-7.42968	4.88e-12	3.28e-10	16.9276	Down-Regulated
EGR2	-2.06173	6.39732	-7.42814	4.92e-12	3.28e-10	16.9191	Down-Regulated
HPSE	-1.965	6.02377	-7.42762	4.94e-12	3.28e-10	16.9161	Down-Regulated
RPH3A	-2.4153	2.71284	-7.42628	4.97e-12	3.29e-10	16.9087	Down-Regulated
ANXA2P2	-1.6451	9.51945	-7.35763	7.36e-12	4.78e-10	16.5272	Down-Regulated
HORMAD1	-1.65893	3.1093	-7.34714	7.81e-12	5.06e-10	16.4691	Down-Regulated
FGD4	-1.90847	8.56251	-7.33776	8.24e-12	5.32e-10	16.4171	Down-Regulated
QPCT	-2.3986	5.48667	-7.32551	8.84e-12	5.67e-10	16.3493	Down-Regulated
AANAT	-1.06811	2.48954	-7.31925	9.16e-12	5.86e-10	16.3148	Down-Regulated
CARD16	-1.08803	7.82043	-7.30445	9.96e-12	6.35e-10	16.2329	Down-Regulated
EPS8	-2.26723	6.36977	-7.29481	1.05e-11	6.68e-10	16.1797	Down-Regulated
SLC43A2	-1.5471	8.6975	-7.28063	1.14e-11	7.22e-10	16.1015	Down-Regulated
C2orf58	-1.26388	1.47894	-7.27901	1.15e-11	7.27e-10	16.0926	Down-Regulated
GPR77	-1.84236	4.6424	-7.27843	1.15e-11	7.27e-10	16.0894	Down-Regulated
GPR133	-2.16893	3.7517	-7.27265	1.19e-11	7.48e-10	16.0575	Down-Regulated
SLAMF7	-1.49731	7.76276	-7.27113	1.2e-11	7.51e-10	16.0491	Down-Regulated
NAPSB	-2.50573	7.00245	-7.26225	1.26e-11	7.87e-10	16.0002	Down-Regulated
RASSF4	-1.70058	9.78105	-7.25534	1.32e-11	8.13e-10	15.9622	Down-Regulated
CEBPD	-1.62565	9.19993	-7.2507	1.35e-11	8.32e-10	15.9366	Down-Regulated
CLEC4E	-2.81234	4.93986	-7.22345	1.57e-11	9.68e-10	15.7869	Down-Regulated
AP1S2	-1.15956	9.88544	-7.22162	1.59e-11	9.75e-10	15.7768	Down-Regulated
C9orf47	-2.14659	3.92138	-7.22119	1.6e-11	9.75e-10	15.7744	Down-Regulated
GIMAP7	-1.67112	7.35828	-7.19474	1.85e-11	1.12e-09	15.6294	Down-Regulated
CDA	-2.57469	6.58888	-7.17664	2.05e-11	1.23e-09	15.5303	Down-Regulated
ANXA5	-2.04944	9.48409	-7.16316	2.21e-11	1.32e-09	15.4566	Down-Regulated
OTUD1	-1.06748	8.47767	-7.14631	2.43e-11	1.45e-09	15.3645	Down-Regulated
CDC42EP1	-2.17697	4.70109	-7.13985	2.52e-11	1.48e-09	15.3293	Down-Regulated
CREB5	-1.8868	7.91719	-7.12535	2.73e-11	1.6e-09	15.2502	Down-Regulated
JAZF1	-1.23775	8.21688	-7.11173	2.95e-11	1.71e-09	15.176	Down-Regulated
CD1E	-2.45536	2.36672	-7.11167	2.95e-11	1.71e-09	15.1756	Down-Regulated
NHS	-1.72839	4.65009	-7.1097	2.98e-11	1.73e-09	15.1649	Down-Regulated
HLA-DMB	-1.69613	9.93857	-7.10029	3.15e-11	1.81e-09	15.1137	Down-Regulated
CASP1	-1.0793	9.97593	-7.09952	3.16e-11	1.81e-09	15.1095	Down-Regulated
CPM	-2.00887	7.16877	-7.09525	3.24e-11	1.85e-09	15.0863	Down-Regulated
DNASE1L3	-2.31874	3.05874	-7.09247	3.29e-11	1.87e-09	15.0712	Down-Regulated
LIPN	-1.91087	2.64234	-7.08616	3.4e-11	1.93e-09	15.0368	Down-Regulated
TNFSF8	-1.34955	7.53887	-7.07537	3.62e-11	2.05e-09	14.9782	Down-Regulated
ENHO	-1.63459	1.44214	-7.07089	3.71e-11	2.09e-09	14.9539	Down-Regulated
ANG	-1.40842	3.54686	-7.06795	3.77e-11	2.11e-09	14.938	Down-Regulated
ALOX5AP	-1.63915	9.34743	-7.06537	3.82e-11	2.14e-09	14.924	Down-Regulated
SASH1	-2.41382	3.61206	-7.06452	3.84e-11	2.14e-09	14.9194	Down-Regulated
ABCC3	-2.16297	5.09514	-7.05672	4.01e-11	2.23e-09	14.8771	Down-Regulated
CD93	-2.0002	10.5557	-7.05249	4.11e-11	2.28e-09	14.8541	Down-Regulated
CD4	-1.49999	10.6421	-7.02431	4.81e-11	2.64e-09	14.7015	Down-Regulated
CXCR2P1	-2.16475	5.2587	-7.00679	5.3e-11	2.89e-09	14.6068	Down-Regulated
ANXA2	-1.65569	10.9315	-6.99914	5.53e-11	2.99e-09	14.5655	Down-Regulated
PADI2	-2.14311	7.44707	-6.99896	5.53e-11	2.99e-09	14.5646	Down-Regulated
TYMP	-1.78711	8.97057	-6.99398	5.69e-11	3.07e-09	14.5377	Down-Regulated
S100A4	-1.13751	11.0723	-6.98006	6.15e-11	3.3e-09	14.4626	Down-Regulated
2019-09-10	-1.63864	3.3404	-6.96835	6.56e-11	3.49e-09	14.3995	Down-Regulated
ITGAL	-1.10056	12.1846	-6.95356	7.12e-11	3.77e-09	14.3199	Down-Regulated
PLA2G7	-2.11896	2.63401	-6.94919	7.29e-11	3.83e-09	14.2964	Down-Regulated
IER3	-1.81452	5.93328	-6.93758	7.78e-11	4.06e-09	14.234	Down-Regulated
HCK	-1.59481	10.0855	-6.92764	8.21e-11	4.26e-09	14.1806	Down-Regulated
CD300LB	-2.172	7.05993	-6.92034	8.55e-11	4.4e-09	14.1415	Down-Regulated
FCGR3A	-1.92799	8.60537	-6.91906	8.61e-11	4.42e-09	14.1346	Down-Regulated
MICALCL	-1.50437	4.56016	-6.91544	8.79e-11	4.5e-09	14.1152	Down-Regulated
NEDD9	-1.00514	8.56724	-6.91448	8.83e-11	4.51e-09	14.11	Down-Regulated
TMEM176A	-2.50176	5.45121	-6.89348	9.92e-11	5.05e-09	13.9975	Down-Regulated
TUBA4A	-1.45982	8.89367	-6.88649	1.03e-10	5.21e-09	13.9601	Down-Regulated
SLC2A6	-1.44939	7.27658	-6.87903	1.07e-10	5.42e-09	13.9202	Down-Regulated
CCDC109B	-1.05908	7.75432	-6.87509	1.1e-10	5.52e-09	13.8992	Down-Regulated
LYVE1	-2.00208	3.33185	-6.87153	1.12e-10	5.62e-09	13.8802	Down-Regulated
NAMPT	-1.23738	10.4582	-6.87099	1.12e-10	5.62e-09	13.8773	Down-Regulated
AOAH	-1.58841	10.0348	-6.86669	1.15e-10	5.74e-09	13.8543	Down-Regulated
LILRA3	-2.81003	4.82614	-6.86562	1.16e-10	5.76e-09	13.8486	Down-Regulated
C17orf91	-1.21498	6.45653	-6.86313	1.17e-10	5.83e-09	13.8353	Down-Regulated
KCNE1	-2.13597	5.21518	-6.84416	1.3e-10	6.45e-09	13.7341	Down-Regulated
FAM105A	-1.82392	8.70152	-6.83077	1.4e-10	6.88e-09	13.6627	Down-Regulated
ADAM19	-1.27964	7.92673	-6.82367	1.46e-10	7.11e-09	13.6249	Down-Regulated
CX3CR1	-2.13641	9.56956	-6.81212	1.55e-10	7.54e-09	13.5635	Down-Regulated
CASP5	-1.62598	1.92835	-6.81033	1.57e-10	7.6e-09	13.554	Down-Regulated
FN1	-1.77225	7.75379	-6.80827	1.58e-10	7.67e-09	13.543	Down-Regulated
TNFSF15	-1.32162	2.11568	-6.79315	1.72e-10	8.25e-09	13.4627	Down-Regulated
C5orf20	-2.81454	5.95419	-6.78749	1.77e-10	8.49e-09	13.4327	Down-Regulated
FAM49A	-1.37512	7.7079	-6.75583	2.11e-10	9.91e-09	13.2649	Down-Regulated
TIFAB	-2.58542	4.69914	-6.7476	2.21e-10	1.03e-08	13.2214	Down-Regulated
PECAM1	-1.09061	10.17	-6.7394	2.31e-10	1.07e-08	13.178	Down-Regulated
SLC1A3	-1.53447	7.56956	-6.73756	2.33e-10	1.08e-08	13.1683	Down-Regulated
RXRA	-1.16094	10.2551	-6.73698	2.34e-10	1.08e-08	13.1652	Down-Regulated
MS4A14	-1.85017	7.65608	-6.72588	2.48e-10	1.13e-08	13.1066	Down-Regulated
C3	-1.8988	3.78178	-6.72241	2.53e-10	1.15e-08	13.0883	Down-Regulated
C17orf77	-1.13582	0.93118	-6.72065	2.55e-10	1.16e-08	13.079	Down-Regulated
RAPH1	-1.21385	6.82078	-6.68447	3.11e-10	1.4e-08	12.8884	Down-Regulated
LILRA2	-1.42565	9.59002	-6.67847	3.21e-10	1.45e-08	12.8568	Down-Regulated
LOC653653	-1.01499	7.3395	-6.67256	3.31e-10	1.49e-08	12.8258	Down-Regulated
HECW2	-1.2101	3.43824	-6.65904	3.57e-10	1.59e-08	12.7548	Down-Regulated
VSIG2	-1.56773	3.6416	-6.6497	3.75e-10	1.66e-08	12.7058	Down-Regulated
CAMSAP1L1	-1.36113	5.31852	-6.64079	3.94e-10	1.74e-08	12.6591	Down-Regulated
S100A11	-1.31383	10.4245	-6.63194	4.13e-10	1.82e-08	12.6127	Down-Regulated
CFP	-1.26454	10.2127	-6.62608	4.26e-10	1.87e-08	12.5821	Down-Regulated
LOC728392	-1.20899	6.91977	-6.62579	4.27e-10	1.87e-08	12.5806	Down-Regulated
GPNMB	-1.90828	3.95194	-6.62461	4.29e-10	1.88e-08	12.5744	Down-Regulated
VIPR1	-1.5248	6.42989	-6.624	4.31e-10	1.88e-08	12.5712	Down-Regulated
CAPN2	-1.06679	10.8464	-6.59859	4.94e-10	2.12e-08	12.4384	Down-Regulated
STS	-1.10503	8.24649	-6.59457	5.05e-10	2.16e-08	12.4174	Down-Regulated
S100A6	-1.21925	10.1055	-6.54763	6.49e-10	2.73e-08	12.173	Down-Regulated
CSF1R	-1.33498	11.2305	-6.54715	6.51e-10	2.73e-08	12.1705	Down-Regulated
NRP1	-2.37519	5.81612	-6.5451	6.58e-10	2.75e-08	12.1598	Down-Regulated
ALOX5	-1.7393	9.61525	-6.53386	6.99e-10	2.89e-08	12.1015	Down-Regulated
ZNF385A	-1.24949	9.56761	-6.51476	7.74e-10	3.16e-08	12.0025	Down-Regulated
ARSG	-1.21171	5.46367	-6.50988	7.95e-10	3.24e-08	11.9772	Down-Regulated
GCNT2	-1.30983	7.51478	-6.50848	8.01e-10	3.26e-08	11.97	Down-Regulated
MICAL2	-1.23891	9.59251	-6.50346	8.22e-10	3.34e-08	11.9439	Down-Regulated
IL27	-1.02804	1.69363	-6.49665	8.53e-10	3.45e-08	11.9087	Down-Regulated
TMEM150B	-1.8329	5.54792	-6.4841	9.12e-10	3.67e-08	11.8439	Down-Regulated
TNFRSF9	-1.28861	2.89681	-6.48395	9.13e-10	3.67e-08	11.8431	Down-Regulated
SAT1	-1.00882	11.3872	-6.47065	9.8e-10	3.92e-08	11.7744	Down-Regulated
SMPDL3A	-2.19245	3.60634	-6.46786	9.94e-10	3.97e-08	11.76	Down-Regulated
SERPINB9	-1.36513	9.0961	-6.46664	1e-09	3.99e-08	11.7538	Down-Regulated
ITGB2	-1.22108	12.9471	-6.45966	1.04e-09	4.12e-08	11.7177	Down-Regulated
VDR	-1.51667	7.76677	-6.45253	1.08e-09	4.28e-08	11.681	Down-Regulated
GPR120	-1.45177	1.66858	-6.45094	1.09e-09	4.3e-08	11.6728	Down-Regulated
C1orf162	-1.22593	9.70376	-6.44827	1.1e-09	4.36e-08	11.6591	Down-Regulated
WNT5B	-1.34802	3.70302	-6.44201	1.14e-09	4.49e-08	11.6268	Down-Regulated
OLFML3	-1.72243	4.4927	-6.42141	1.27e-09	4.97e-08	11.521	Down-Regulated
PFKFB4	-1.12684	8.01304	-6.41719	1.3e-09	5.06e-08	11.4993	Down-Regulated
CXCL10	-1.72849	3.00844	-6.41433	1.32e-09	5.12e-08	11.4846	Down-Regulated
FGD6	-1.30561	7.36624	-6.41023	1.35e-09	5.22e-08	11.4636	Down-Regulated
PNPLA1	-1.8145	3.6395	-6.40548	1.38e-09	5.34e-08	11.4392	Down-Regulated
GPRIN3	-1.33894	7.90124	-6.4019	1.41e-09	5.43e-08	11.4209	Down-Regulated
OAS2	-1.26029	10.0898	-6.38076	1.58e-09	6e-08	11.3126	Down-Regulated
SIGLEC5	-1.03885	8.60479	-6.36958	1.67e-09	6.31e-08	11.2554	Down-Regulated
DUSP6	-1.2424	11.4691	-6.36894	1.68e-09	6.32e-08	11.2522	Down-Regulated
KCNMB1	-1.64011	6.19581	-6.36023	1.76e-09	6.6e-08	11.2077	Down-Regulated
LGMN	-1.70421	5.74625	-6.3457	1.9e-09	7.04e-08	11.1336	Down-Regulated
LEPREL1	-1.6564	2.82443	-6.338	1.98e-09	7.31e-08	11.0943	Down-Regulated
TNFRSF11A	-1.93545	4.16261	-6.3209	2.16e-09	7.93e-08	11.0073	Down-Regulated
ASAP1IT1	-1.13502	3.9235	-6.31755	2.2e-09	8.05e-08	10.9902	Down-Regulated
ARAP3	-1.95017	7.34207	-6.2946	2.48e-09	8.97e-08	10.8737	Down-Regulated
CPAMD8	-1.72373	4.37138	-6.28557	2.6e-09	9.34e-08	10.8279	Down-Regulated
FAM157B	-1.67368	2.70254	-6.28025	2.68e-09	9.55e-08	10.801	Down-Regulated
NRGN	-1.71692	8.65823	-6.2671	2.87e-09	1.02e-07	10.7344	Down-Regulated
UPP1	-1.43197	7.0036	-6.2669	2.87e-09	1.02e-07	10.7333	Down-Regulated
RHOU	-1.4369	8.15212	-6.25856	3e-09	1.06e-07	10.6912	Down-Regulated
LILRA1	-1.90229	7.62944	-6.25664	3.03e-09	1.06e-07	10.6815	Down-Regulated
SIGLEC10	-1.20825	8.76322	-6.25175	3.1e-09	1.09e-07	10.6568	Down-Regulated
APOL3	-1.03016	8.56263	-6.23906	3.32e-09	1.16e-07	10.5927	Down-Regulated
MYO1E	-1.45294	6.22132	-6.23826	3.33e-09	1.16e-07	10.5886	Down-Regulated
PARM1	-1.34685	5.16302	-6.23782	3.34e-09	1.16e-07	10.5864	Down-Regulated
MMP25	-1.47866	6.75064	-6.23162	3.45e-09	1.19e-07	10.5552	Down-Regulated
GFRA2	-1.48573	3.29175	-6.23154	3.45e-09	1.19e-07	10.5548	Down-Regulated
PMM1	-1.11153	5.98335	-6.22861	3.5e-09	1.2e-07	10.54	Down-Regulated
DGAT2	-1.67467	6.03038	-6.22452	3.58e-09	1.23e-07	10.5194	Down-Regulated
TMEM170B	-1.22402	10.638	-6.21354	3.79e-09	1.28e-07	10.4641	Down-Regulated
GPR183	-1.03657	9.37929	-6.20651	3.93e-09	1.32e-07	10.4288	Down-Regulated
KCNQ1	-1.68065	7.03712	-6.19934	4.08e-09	1.37e-07	10.3927	Down-Regulated
TNFRSF8	-1.46934	5.00033	-6.19828	4.1e-09	1.37e-07	10.3874	Down-Regulated
C1QB	-2.30867	5.50791	-6.1968	4.13e-09	1.38e-07	10.3799	Down-Regulated
ATOH8	-1.29399	2.79743	-6.19505	4.17e-09	1.39e-07	10.3712	Down-Regulated
IFNK	-1.1682	2.92166	-6.18104	4.48e-09	1.49e-07	10.3008	Down-Regulated
MYO7A	-2.23117	5.21552	-6.17833	4.55e-09	1.51e-07	10.2873	Down-Regulated
LOC285780	-1.33981	2.68718	-6.15553	5.12e-09	1.67e-07	10.1731	Down-Regulated
NOS3	-1.31261	3.67277	-6.1495	5.28e-09	1.72e-07	10.1429	Down-Regulated
FBP1	-1.97807	6.93201	-6.14027	5.54e-09	1.79e-07	10.0968	Down-Regulated
GIMAP5	-1.15504	7.48021	-6.14001	5.54e-09	1.79e-07	10.0955	Down-Regulated
GPR34	-1.35319	5.88706	-6.14	5.54e-09	1.79e-07	10.0955	Down-Regulated
TKTL2	-1.10653	1.51851	-6.13808	5.6e-09	1.8e-07	10.0859	Down-Regulated
IL15	-1.70328	4.03648	-6.13596	5.66e-09	1.81e-07	10.0753	Down-Regulated
STEAP4	-1.76969	4.94656	-6.13432	5.71e-09	1.83e-07	10.0671	Down-Regulated
SERPINB2	-2.47003	6.27173	-6.12197	6.08e-09	1.93e-07	10.0055	Down-Regulated
OR52K2	-1.63552	2.9706	-6.11895	6.18e-09	1.95e-07	9.9904	Down-Regulated
A2M	-2.01195	5.3126	-6.1134	6.36e-09	2e-07	9.96276	Down-Regulated
FCGR1B	-1.40154	7.7981	-6.11183	6.41e-09	2.01e-07	9.95495	Down-Regulated
TMEM176B	-2.35773	6.2607	-6.11033	6.46e-09	2.02e-07	9.9475	Down-Regulated
TLR4	-1.48076	10.1581	-6.10229	6.73e-09	2.1e-07	9.90747	Down-Regulated
MAN1C1	-1.28251	5.85448	-6.10079	6.79e-09	2.11e-07	9.89998	Down-Regulated
NRP2	-1.76189	4.02382	-6.08495	7.36e-09	2.28e-07	9.82127	Down-Regulated
DOK2	-1.19541	8.62039	-6.0803	7.54e-09	2.32e-07	9.79818	Down-Regulated
TIMD4	-1.75055	3.2484	-6.07891	7.59e-09	2.34e-07	9.7913	Down-Regulated
BLVRA	-1.4687	7.37881	-6.05975	8.38e-09	2.54e-07	9.69631	Down-Regulated
RRAS	-1.22664	6.88546	-6.05235	8.7e-09	2.63e-07	9.65968	Down-Regulated
FOLR3	-1.98573	2.78585	-6.05073	8.77e-09	2.65e-07	9.65167	Down-Regulated
PDE2A	-1.58633	3.4651	-6.04149	9.2e-09	2.74e-07	9.60596	Down-Regulated
SERPINB8	-1.24997	9.97109	-6.04101	9.22e-09	2.75e-07	9.6036	Down-Regulated
FMN1	-1.61857	3.77766	-6.03989	9.27e-09	2.76e-07	9.59806	Down-Regulated
HP	-1.71704	6.19382	-6.00834	1.09e-08	3.17e-07	9.4424	Down-Regulated
CST3	-1.52355	11.3579	-5.99828	1.15e-08	3.32e-07	9.39289	Down-Regulated
TFEB	-1.13804	8.15936	-5.99302	1.18e-08	3.4e-07	9.36698	Down-Regulated
MAML2	-1.15058	8.10055	-5.98506	1.23e-08	3.53e-07	9.32789	Down-Regulated
PHOSPHO1	-1.46575	5.57591	-5.9836	1.24e-08	3.54e-07	9.32069	Down-Regulated
CLEC6A	-1.1019	1.00955	-5.96047	1.39e-08	3.93e-07	9.20721	Down-Regulated
ADM	-1.68523	4.58599	-5.94788	1.48e-08	4.16e-07	9.14556	Down-Regulated
MDFIC	-1.27293	9.74038	-5.93576	1.57e-08	4.38e-07	9.08633	Down-Regulated
APCDD1	-1.97007	3.82802	-5.91313	1.77e-08	4.86e-07	8.97586	Down-Regulated
ITGB7	-1.04809	9.81491	-5.90767	1.81e-08	4.98e-07	8.94926	Down-Regulated
FCGR1C	-1.40217	6.22516	-5.90288	1.86e-08	5.09e-07	8.92593	Down-Regulated
OLFM1	-1.44606	1.76708	-5.90212	1.87e-08	5.11e-07	8.92225	Down-Regulated
IFIT2	-1.00518	7.21368	-5.89989	1.89e-08	5.14e-07	8.91139	Down-Regulated
CD1B	-1.3113	0.883339	-5.89964	1.89e-08	5.14e-07	8.91017	Down-Regulated
IL6ST	-1.08337	8.91442	-5.89311	1.95e-08	5.3e-07	8.87841	Down-Regulated
TREM1	-1.78115	6.82913	-5.8864	2.02e-08	5.46e-07	8.84578	Down-Regulated
GRN	-1.15119	12.8945	-5.87655	2.12e-08	5.71e-07	8.79791	Down-Regulated
BCL2A1	-1.43558	7.29958	-5.87536	2.13e-08	5.72e-07	8.79216	Down-Regulated
TLR6	-1.11378	8.0673	-5.87322	2.16e-08	5.78e-07	8.78178	Down-Regulated
BLVRB	-1.0383	9.09442	-5.87257	2.16e-08	5.78e-07	8.77861	Down-Regulated
LILRA4	-1.87272	3.7136	-5.87255	2.17e-08	5.78e-07	8.77849	Down-Regulated
TMEM38A	-1.46024	2.98339	-5.85869	2.32e-08	6.13e-07	8.71132	Down-Regulated
EXT1	-1.45673	5.72924	-5.85278	2.39e-08	6.28e-07	8.68268	Down-Regulated
FLVCR2	-1.07313	7.10428	-5.85275	2.39e-08	6.28e-07	8.68254	Down-Regulated
HAVCR2	-1.24677	8.44404	-5.8488	2.44e-08	6.39e-07	8.66342	Down-Regulated
KCNJ15	-1.74778	3.25671	-5.84754	2.45e-08	6.42e-07	8.65734	Down-Regulated
NACC2	-1.31902	5.98993	-5.84051	2.54e-08	6.64e-07	8.62334	Down-Regulated
ZNF467	-1.09328	8.55193	-5.83941	2.56e-08	6.67e-07	8.61801	Down-Regulated
PDCD1LG2	-1.15309	3.07731	-5.8384	2.57e-08	6.69e-07	8.61313	Down-Regulated
NID1	-2.05793	8.42312	-5.83792	2.58e-08	6.69e-07	8.61079	Down-Regulated
THBD	-1.25251	6.64743	-5.82905	2.69e-08	6.95e-07	8.56795	Down-Regulated
SLED1	-1.43596	4.5433	-5.81022	2.96e-08	7.55e-07	8.47713	Down-Regulated
SIRPB2	-1.34967	9.98708	-5.80706	3.01e-08	7.65e-07	8.46191	Down-Regulated
DPYSL2	-1.37366	10.1119	-5.80443	3.05e-08	7.74e-07	8.44925	Down-Regulated
SH3TC1	-1.16949	9.16789	-5.79445	3.2e-08	8.09e-07	8.40123	Down-Regulated
CCIN	-1.17195	3.97038	-5.75127	3.97e-08	9.85e-07	8.19407	Down-Regulated
2019-09-04	-1.15505	3.13211	-5.74072	4.18e-08	1.03e-06	8.14362	Down-Regulated
THBS1	-2.16421	8.5551	-5.73882	4.22e-08	1.03e-06	8.13454	Down-Regulated
HLA-DRA	-1.50664	13.3175	-5.73316	4.34e-08	1.06e-06	8.10751	Down-Regulated
GNPDA1	-1.07413	8.50459	-5.73218	4.36e-08	1.06e-06	8.10282	Down-Regulated
LPHN2	-1.80899	3.24461	-5.72567	4.5e-08	1.09e-06	8.07176	Down-Regulated
CD180	-1.44279	9.82352	-5.72163	4.59e-08	1.11e-06	8.05251	Down-Regulated
CLEC12A	-1.0204	10.3987	-5.71701	4.7e-08	1.13e-06	8.03048	Down-Regulated
RASGEF1B	-1.19785	8.34759	-5.71671	4.71e-08	1.13e-06	8.02905	Down-Regulated
CYP27A1	-2.25772	4.7505	-5.70877	4.9e-08	1.17e-06	7.99123	Down-Regulated
CCL2	-1.39924	1.7331	-5.70854	4.9e-08	1.17e-06	7.99012	Down-Regulated
ME1	-1.96037	4.61337	-5.70419	5.01e-08	1.19e-06	7.96943	Down-Regulated
TYROBP	-1.15462	10.814	-5.70379	5.02e-08	1.19e-06	7.96752	Down-Regulated
PGM5	-1.559	1.95652	-5.67891	5.67e-08	1.34e-06	7.84932	Down-Regulated
KYNU	-2.14672	7.05596	-5.67854	5.68e-08	1.34e-06	7.84755	Down-Regulated
TLR2	-1.13005	10.9084	-5.67628	5.75e-08	1.35e-06	7.83684	Down-Regulated
C21orf67	-1.00283	5.07533	-5.66752	6e-08	1.39e-06	7.7953	Down-Regulated
SLC2A3	-1.01908	11.1007	-5.66011	6.22e-08	1.44e-06	7.76018	Down-Regulated
C1QC	-2.10972	5.18233	-5.65941	6.24e-08	1.44e-06	7.75691	Down-Regulated
MTSS1	-1.104	9.34775	-5.64796	6.6e-08	1.52e-06	7.70271	Down-Regulated
FCER2	-1.63665	6.60282	-5.64726	6.63e-08	1.52e-06	7.69944	Down-Regulated
EEF1DP3	-1.22623	3.05301	-5.64681	6.64e-08	1.52e-06	7.69728	Down-Regulated
C10orf105	-1.3299	5.78099	-5.63105	7.17e-08	1.64e-06	7.62288	Down-Regulated
DHRS9	-2.11358	6.78334	-5.62818	7.27e-08	1.66e-06	7.60935	Down-Regulated
SIGLEC14	-1.428	8.17785	-5.60717	8.06e-08	1.81e-06	7.51041	Down-Regulated
CLEC4F	-1.28036	1.41475	-5.60637	8.09e-08	1.82e-06	7.50667	Down-Regulated
GPR84	-1.34136	4.54578	-5.6014	8.29e-08	1.86e-06	7.48328	Down-Regulated
KCNJ2	-1.83381	3.69636	-5.59024	8.75e-08	1.95e-06	7.43088	Down-Regulated
HLA-DQA1	-1.66536	9.09951	-5.58968	8.78e-08	1.95e-06	7.42825	Down-Regulated
PIGR	-1.20017	1.87342	-5.5831	9.06e-08	2.01e-06	7.39737	Down-Regulated
ODF3B	-1.56282	5.21244	-5.57137	9.6e-08	2.11e-06	7.3424	Down-Regulated
LPL	-1.97526	5.27621	-5.54187	1.11e-07	2.39e-06	7.20453	Down-Regulated
FCGR1A	-1.41166	7.67244	-5.54138	1.11e-07	2.39e-06	7.20223	Down-Regulated
MYBPH	-1.64771	1.9389	-5.53729	1.13e-07	2.43e-06	7.18316	Down-Regulated
ODZ4	-1.6261	3.56497	-5.53678	1.14e-07	2.44e-06	7.18077	Down-Regulated
BST1	-1.22454	8.70436	-5.52705	1.19e-07	2.55e-06	7.13541	Down-Regulated
ANGPTL2	-1.27053	3.50395	-5.52254	1.22e-07	2.59e-06	7.11446	Down-Regulated
HLA-DRB1	-1.45589	10.6812	-5.50764	1.31e-07	2.78e-06	7.04518	Down-Regulated
CCR3	-1.25187	3.22608	-5.50658	1.31e-07	2.78e-06	7.04022	Down-Regulated
MGP	-1.63044	2.80012	-5.50449	1.33e-07	2.8e-06	7.03051	Down-Regulated
LFNG	-1.11065	8.45327	-5.50138	1.35e-07	2.84e-06	7.01608	Down-Regulated
TNFAIP2	-1.25109	11.0083	-5.47937	1.5e-07	3.11e-06	6.91408	Down-Regulated
ABCA6	-1.55342	4.025	-5.47263	1.55e-07	3.21e-06	6.88288	Down-Regulated
SERPINF1	-1.4699	6.9173	-5.46671	1.59e-07	3.29e-06	6.85549	Down-Regulated
FAM114A1	-1.22104	4.83416	-5.46219	1.63e-07	3.35e-06	6.83463	Down-Regulated
ANXA2P1	-1.17456	4.94724	-5.45923	1.65e-07	3.39e-06	6.82095	Down-Regulated
CPVL	-1.79496	8.73392	-5.45649	1.67e-07	3.42e-06	6.8083	Down-Regulated
ADAP1	-1.00391	8.84266	-5.45312	1.7e-07	3.46e-06	6.79276	Down-Regulated
FABP4	-1.85192	2.89778	-5.45174	1.71e-07	3.48e-06	6.78641	Down-Regulated
TRPV4	-1.52009	1.69507	-5.44492	1.77e-07	3.58e-06	6.75496	Down-Regulated
ST14	-1.86002	6.74386	-5.4102	2.09e-07	4.19e-06	6.59528	Down-Regulated
EPSTI1	-1.60202	6.15303	-5.40326	2.16e-07	4.29e-06	6.56348	Down-Regulated
GBP1	-1.49938	6.99597	-5.40242	2.16e-07	4.3e-06	6.55965	Down-Regulated
P2RY6	-1.31963	4.30113	-5.4022	2.17e-07	4.3e-06	6.55861	Down-Regulated
PTK2	-2.02154	6.58842	-5.39077	2.29e-07	4.52e-06	6.50628	Down-Regulated
CDC42EP3	-1.0791	9.94802	-5.37913	2.42e-07	4.74e-06	6.45308	Down-Regulated
CRIP3	-1.17561	2.4772	-5.37629	2.45e-07	4.8e-06	6.44007	Down-Regulated
CAMK1	-1.20325	6.86947	-5.36916	2.54e-07	4.94e-06	6.40754	Down-Regulated
RIN1	-1.22171	6.76058	-5.35644	2.69e-07	5.22e-06	6.34952	Down-Regulated
LOC388387	-1.37912	2.30279	-5.35179	2.75e-07	5.31e-06	6.32837	Down-Regulated
HLA-DPA1	-1.51526	11.6395	-5.34105	2.9e-07	5.57e-06	6.27948	Down-Regulated
IGF2	-1.92506	5.0301	-5.33252	3.02e-07	5.75e-06	6.24076	Down-Regulated
SLC37A3	-1.13158	6.54575	-5.3136	3.3e-07	6.23e-06	6.15496	Down-Regulated
HDAC9	-1.32255	8.67626	-5.3118	3.33e-07	6.28e-06	6.14677	Down-Regulated
OTOA	-1.5122	2.42779	-5.30273	3.47e-07	6.51e-06	6.10574	Down-Regulated
FRZB	-1.5902	2.24563	-5.29715	3.56e-07	6.66e-06	6.08052	Down-Regulated
TNFSF12	-1.24247	6.46475	-5.29508	3.6e-07	6.72e-06	6.07116	Down-Regulated
CEACAM3	-1.62935	2.68872	-5.28105	3.84e-07	7.12e-06	6.00784	Down-Regulated
CDKN2B	-1.39876	4.71	-5.27953	3.87e-07	7.17e-06	6.00097	Down-Regulated
PTGS2	-1.51843	8.74433	-5.24828	4.48e-07	8.18e-06	5.8604	Down-Regulated
ACPP	-1.31306	7.67292	-5.24683	4.51e-07	8.22e-06	5.85385	Down-Regulated
OR7E91P	-1.14758	1.39098	-5.2365	4.73e-07	8.56e-06	5.80752	Down-Regulated
LOC152225	-1.20999	1.2496	-5.23447	4.78e-07	8.62e-06	5.79844	Down-Regulated
EPB41L3	-2.10503	5.25602	-5.22599	4.97e-07	8.94e-06	5.76045	Down-Regulated
CDH5	-1.64784	3.51529	-5.21529	5.23e-07	9.31e-06	5.71262	Down-Regulated
C9orf106	-1.08425	1.68955	-5.21165	5.32e-07	9.44e-06	5.69636	Down-Regulated
NEXN	-1.24381	6.57072	-5.19884	5.64e-07	9.96e-06	5.63916	Down-Regulated
PDE4B	-1.00691	9.35299	-5.18564	6e-07	1.05e-05	5.58038	Down-Regulated
IGF2R	-1.24902	10.2842	-5.17396	6.33e-07	1.1e-05	5.52845	Down-Regulated
CXCL9	-1.57984	2.42469	-5.1738	6.34e-07	1.1e-05	5.52772	Down-Regulated
SH3BP5	-1.3641	7.51854	-5.17215	6.39e-07	1.11e-05	5.5204	Down-Regulated
SPOCK1	-1.65332	3.72954	-5.17111	6.42e-07	1.11e-05	5.51575	Down-Regulated
SORT1	-1.94008	8.99884	-5.16522	6.59e-07	1.13e-05	5.48963	Down-Regulated
ZBP1	-1.05613	5.18743	-5.16355	6.65e-07	1.14e-05	5.48222	Down-Regulated
CYTH4	-1.04842	10.6287	-5.16221	6.69e-07	1.14e-05	5.47624	Down-Regulated
IL1R2	-2.09298	3.06005	-5.16143	6.71e-07	1.14e-05	5.47279	Down-Regulated
PGA3	-1.1715	1.06833	-5.14977	7.08e-07	1.2e-05	5.42113	Down-Regulated
BLNK	-1.66685	6.49789	-5.13602	7.55e-07	1.26e-05	5.36032	Down-Regulated
CCDC80	-1.60527	3.70328	-5.1321	7.68e-07	1.28e-05	5.34297	Down-Regulated
AMIGO2	-1.07866	5.64206	-5.13093	7.73e-07	1.29e-05	5.33779	Down-Regulated
SMOC1	-1.2966	1.7254	-5.12707	7.86e-07	1.3e-05	5.32076	Down-Regulated
ABCA9	-1.48985	4.29694	-5.12681	7.87e-07	1.3e-05	5.31962	Down-Regulated
EPHB3	-1.72328	4.83794	-5.12622	7.89e-07	1.3e-05	5.31703	Down-Regulated
CLEC4G	-1.53897	3.18003	-5.1258	7.91e-07	1.3e-05	5.31517	Down-Regulated
GRK5	-1.03248	6.3788	-5.12491	7.94e-07	1.31e-05	5.31122	Down-Regulated
ANKRD34B	-1.46737	1.92628	-5.12358	7.99e-07	1.32e-05	5.30537	Down-Regulated
ITGA8	-1.23998	1.66685	-5.12172	8.06e-07	1.33e-05	5.29715	Down-Regulated
PFKFB2	-1.205	7.68224	-5.12147	8.07e-07	1.33e-05	5.29607	Down-Regulated
ITIH5	-1.4118	2.19218	-5.11188	8.43e-07	1.38e-05	5.25379	Down-Regulated
LSP1	-1.25455	10.886	-5.11145	8.45e-07	1.38e-05	5.25192	Down-Regulated
KIAA1598	-1.96838	6.4759	-5.11044	8.49e-07	1.39e-05	5.24747	Down-Regulated
CEBPB	-1.01448	9.0074	-5.10991	8.51e-07	1.39e-05	5.2451	Down-Regulated
CECR6	-1.64211	6.54473	-5.10908	8.54e-07	1.39e-05	5.24148	Down-Regulated
OSCAR	-1.49299	8.78637	-5.09328	9.18e-07	1.48e-05	5.172	Down-Regulated
YAP1	-1.38597	2.10008	-5.08612	9.49e-07	1.53e-05	5.14053	Down-Regulated
KIF17	-1.97232	4.59802	-5.08389	9.59e-07	1.54e-05	5.13076	Down-Regulated
TNFAIP6	-1.43088	3.8855	-5.0832	9.62e-07	1.54e-05	5.12774	Down-Regulated
ANKRD57	-1.23486	2.42136	-5.0782	9.84e-07	1.57e-05	5.10583	Down-Regulated
DCLK1	-1.26556	1.69558	-5.07241	1.01e-06	1.6e-05	5.08044	Down-Regulated
SLC24A4	-1.60862	7.68086	-5.06871	1.03e-06	1.63e-05	5.06424	Down-Regulated
TNNI2	-1.65813	3.81415	-5.06133	1.06e-06	1.67e-05	5.03195	Down-Regulated
LST1	-1.10556	9.36668	-5.04817	1.13e-06	1.76e-05	4.97446	Down-Regulated
MRC1	-2.25851	5.9428	-5.0458	1.14e-06	1.77e-05	4.96412	Down-Regulated
RUFY4	-1.43306	3.43256	-5.04357	1.15e-06	1.79e-05	4.95441	Down-Regulated
SEMA4A	-1.01851	10.2286	-5.04065	1.17e-06	1.81e-05	4.9417	Down-Regulated
IQSEC2	-1.09581	7.83914	-5.03539	1.2e-06	1.85e-05	4.91878	Down-Regulated
DAGLA	-1.44749	6.10592	-5.02779	1.24e-06	1.91e-05	4.88568	Down-Regulated
OLR1	-1.53288	3.81193	-5.01891	1.29e-06	1.98e-05	4.84706	Down-Regulated
CAMK2D	-1.25081	6.89661	-5.01547	1.31e-06	2e-05	4.83213	Down-Regulated
COLEC12	-1.47879	2.99222	-5.01013	1.34e-06	2.04e-05	4.80895	Down-Regulated
CCL14	-1.66653	2.68094	-4.99395	1.44e-06	2.18e-05	4.73882	Down-Regulated
ADAMDEC1	-1.5617	3.05034	-4.97849	1.55e-06	2.32e-05	4.67196	Down-Regulated
CES1	-2.62206	4.3136	-4.97388	1.58e-06	2.36e-05	4.65205	Down-Regulated
TJP1	-1.3975	2.55786	-4.9669	1.63e-06	2.42e-05	4.62193	Down-Regulated
C8orf80	-1.08759	3.74338	-4.96361	1.66e-06	2.45e-05	4.60774	Down-Regulated
EPAS1	-1.39639	6.32005	-4.96311	1.66e-06	2.46e-05	4.60561	Down-Regulated
SLIT3	-1.22784	1.37945	-4.95776	1.7e-06	2.5e-05	4.58257	Down-Regulated
ESM1	-1.49176	2.42508	-4.95425	1.73e-06	2.52e-05	4.56744	Down-Regulated
LOC729603	-1.15998	5.89819	-4.95411	1.73e-06	2.52e-05	4.56685	Down-Regulated
SLCO4C1	-1.24499	7.34391	-4.95102	1.75e-06	2.55e-05	4.55354	Down-Regulated
MX1	-1.27146	8.35221	-4.94888	1.77e-06	2.57e-05	4.54435	Down-Regulated
CRYBG3	-1.33007	7.33116	-4.94827	1.77e-06	2.57e-05	4.54172	Down-Regulated
PLA2G2D	-1.10553	2.38239	-4.93871	1.85e-06	2.67e-05	4.50066	Down-Regulated
RGL3	-1.11755	2.29358	-4.93504	1.88e-06	2.71e-05	4.48491	Down-Regulated
SULT1B1	-1.08479	6.18556	-4.93399	1.89e-06	2.72e-05	4.48039	Down-Regulated
CLEC4C	-1.89274	2.1727	-4.91795	2.03e-06	2.89e-05	4.41168	Down-Regulated
MEIS3P1	-1.15352	3.78865	-4.91642	2.05e-06	2.9e-05	4.40509	Down-Regulated
AIM2	-1.15338	4.79268	-4.91601	2.05e-06	2.9e-05	4.40335	Down-Regulated
ALPL	-1.69758	4.33657	-4.91197	2.09e-06	2.94e-05	4.38608	Down-Regulated
HLA-DQB1	-1.61202	9.4421	-4.89775	2.22e-06	3.1e-05	4.32532	Down-Regulated
SLCO2B1	-1.65702	3.27468	-4.88462	2.36e-06	3.26e-05	4.26938	Down-Regulated
CDH23	-1.05893	6.90984	-4.87601	2.45e-06	3.36e-05	4.23273	Down-Regulated
VSTM1	-2.15053	6.00912	-4.87588	2.45e-06	3.36e-05	4.23218	Down-Regulated
KREMEN1	-1.23673	5.11603	-4.8577	2.66e-06	3.61e-05	4.15499	Down-Regulated
C7orf58	-1.8017	4.65658	-4.85028	2.75e-06	3.71e-05	4.12355	Down-Regulated
VEGFC	-1.22493	2.53347	-4.84879	2.77e-06	3.73e-05	4.11721	Down-Regulated
ID4	-1.17795	1.52318	-4.84407	2.82e-06	3.79e-05	4.09725	Down-Regulated
MARCKS	-1.30516	8.25472	-4.83951	2.88e-06	3.86e-05	4.07795	Down-Regulated
IFIT1	-1.07552	6.24053	-4.83753	2.91e-06	3.89e-05	4.06958	Down-Regulated
CXCL14	-1.29767	1.52809	-4.83523	2.94e-06	3.92e-05	4.05987	Down-Regulated
FLT1	-1.0673	4.19711	-4.82797	3.03e-06	4.03e-05	4.02919	Down-Regulated
RBMS3	-1.10428	1.47835	-4.82443	3.08e-06	4.08e-05	4.01428	Down-Regulated
TLR10	-1.00831	6.30987	-4.82389	3.09e-06	4.09e-05	4.012	Down-Regulated
TNC	-1.44071	5.89251	-4.82335	3.09e-06	4.1e-05	4.00971	Down-Regulated
HTR7	-1.84414	4.48314	-4.81608	3.2e-06	4.21e-05	3.97905	Down-Regulated
PPM1J	-1.46347	2.61415	-4.8092	3.29e-06	4.33e-05	3.95011	Down-Regulated
SLC4A3	-1.63704	3.50151	-4.79625	3.49e-06	4.55e-05	3.89564	Down-Regulated
PRKCA	-1.13939	9.09928	-4.78385	3.68e-06	4.77e-05	3.84363	Down-Regulated
NR2F1	-1.06764	1.58982	-4.77602	3.81e-06	4.9e-05	3.81085	Down-Regulated
ST6GALNAC3	-1.30456	3.1602	-4.77501	3.83e-06	4.92e-05	3.80662	Down-Regulated
NGFR	-1.17091	4.63529	-4.7491	4.29e-06	5.42e-05	3.69841	Down-Regulated
MTUS1	-1.06123	3.80879	-4.73981	4.47e-06	5.63e-05	3.65972	Down-Regulated
CD74	-1.08789	14.8246	-4.73254	4.61e-06	5.77e-05	3.62948	Down-Regulated
CATSPER1	-1.24916	3.78629	-4.72898	4.68e-06	5.84e-05	3.61469	Down-Regulated
FAM20C	-1.45206	6.62094	-4.72286	4.81e-06	5.97e-05	3.58925	Down-Regulated
RNF144B	-1.02794	8.60545	-4.70397	5.22e-06	6.38e-05	3.51097	Down-Regulated
PPFIBP2	-1.16182	6.17924	-4.69779	5.36e-06	6.52e-05	3.48541	Down-Regulated
IFI44L	-1.58655	7.22061	-4.69775	5.36e-06	6.52e-05	3.48525	Down-Regulated
NCKAP5	-1.04298	1.65378	-4.67394	5.94e-06	7.16e-05	3.38703	Down-Regulated
PCDH18	-1.57794	2.95448	-4.67209	5.99e-06	7.21e-05	3.37942	Down-Regulated
C13orf18	-1.17002	6.83362	-4.66975	6.05e-06	7.26e-05	3.36977	Down-Regulated
FPR3	-1.14685	4.30455	-4.66038	6.3e-06	7.51e-05	3.33125	Down-Regulated
HLA-DQA2	-1.61867	5.96738	-4.65265	6.52e-06	7.73e-05	3.29951	Down-Regulated
SGMS2	-1.63446	7.46531	-4.65214	6.53e-06	7.74e-05	3.29743	Down-Regulated
HLA-DPB1	-1.29325	10.7943	-4.64745	6.66e-06	7.88e-05	3.2782	Down-Regulated
DYSF	-1.54019	9.60958	-4.64515	6.73e-06	7.94e-05	3.26876	Down-Regulated
FFAR3	-1.05879	1.7246	-4.64419	6.76e-06	7.97e-05	3.26484	Down-Regulated
GNG11	-1.72948	4.32933	-4.63883	6.92e-06	8.13e-05	3.24288	Down-Regulated
TMEM47	-1.07383	1.56813	-4.63535	7.02e-06	8.23e-05	3.22865	Down-Regulated
CAMP	-1.481	2.81876	-4.63388	7.06e-06	8.28e-05	3.22264	Down-Regulated
ABCA8	-1.39292	2.02522	-4.62245	7.42e-06	8.64e-05	3.17592	Down-Regulated
ITGAX	-1.14838	10.7771	-4.61698	7.6e-06	8.83e-05	3.1536	Down-Regulated
CXorf36	-1.14863	2.02358	-4.61333	7.71e-06	8.95e-05	3.13871	Down-Regulated
OR52K1	-1.02645	1.71562	-4.60758	7.91e-06	9.15e-05	3.11531	Down-Regulated
C6orf192	-1.03732	6.04519	-4.60195	8.1e-06	9.34e-05	3.09239	Down-Regulated
SNX25	-1.11644	4.94468	-4.60144	8.12e-06	9.36e-05	3.09031	Down-Regulated
COL1A2	-2.04438	4.39414	-4.59794	8.24e-06	9.47e-05	3.0761	Down-Regulated
CXCL12	-2.37094	7.88283	-4.59604	8.31e-06	9.53e-05	3.06838	Down-Regulated
ABLIM3	-1.35044	3.40081	-4.5916	8.47e-06	9.68e-05	3.0503	Down-Regulated
CALD1	-1.26781	5.04999	-4.59115	8.48e-06	9.69e-05	3.0485	Down-Regulated
CSTA	-1.58253	8.3207	-4.59111	8.48e-06	9.69e-05	3.04832	Down-Regulated
FAM82A1	-1.20919	5.17019	-4.57236	9.19e-06	0.000103	2.97233	Down-Regulated
SCARA5	-1.04512	1.11786	-4.56951	9.3e-06	0.000104	2.96079	Down-Regulated
ACOX2	-1.36964	2.50771	-4.56737	9.39e-06	0.000105	2.95214	Down-Regulated
HTRA1	-1.1588	2.09649	-4.55632	9.84e-06	0.000109	2.90749	Down-Regulated
LDB2	-1.04921	2.03445	-4.54332	1.04e-05	0.000114	2.85505	Down-Regulated
ELTD1	-1.39196	2.1659	-4.53803	1.06e-05	0.000116	2.83379	Down-Regulated
NR4A1	-1.2484	8.49437	-4.53234	1.09e-05	0.000119	2.8109	Down-Regulated
KCNH3	-1.07132	4.71901	-4.52862	1.11e-05	0.00012	2.79592	Down-Regulated
TMTC1	-1.42301	3.09968	-4.52779	1.11e-05	0.000121	2.7926	Down-Regulated
DAAM2	-1.56056	3.37133	-4.52289	1.13e-05	0.000123	2.77294	Down-Regulated
C15orf38	-1.44136	3.91273	-4.51075	1.19e-05	0.000128	2.72425	Down-Regulated
SPARCL1	-1.35344	3.8656	-4.50515	1.22e-05	0.000131	2.70184	Down-Regulated
BMP5	-1.17371	1.62269	-4.50434	1.23e-05	0.000131	2.6986	Down-Regulated
ZFHX4	-1.15688	2.38585	-4.50043	1.25e-05	0.000133	2.68298	Down-Regulated
HLA-DRB6	-1.56675	7.0377	-4.49815	1.26e-05	0.000134	2.67383	Down-Regulated
FZD2	-1.38756	5.92873	-4.49664	1.27e-05	0.000135	2.66782	Down-Regulated
COL8A2	-1.17778	5.87261	-4.4866	1.32e-05	0.00014	2.62774	Down-Regulated
AMPD1	-1.39068	2.85854	-4.48424	1.33e-05	0.000141	2.61835	Down-Regulated
GPR116	-1.32932	2.22845	-4.47606	1.38e-05	0.000145	2.58573	Down-Regulated
ATP10A	-1.54643	7.65096	-4.45607	1.5e-05	0.000156	2.50631	Down-Regulated
LPAR6	-1.05296	8.55839	-4.45606	1.5e-05	0.000156	2.50627	Down-Regulated
TMEM132C	-1.16821	1.90315	-4.45411	1.51e-05	0.000157	2.49854	Down-Regulated
PMP22	-1.56532	4.68907	-4.45153	1.53e-05	0.000159	2.48832	Down-Regulated
COL3A1	-1.84196	4.01159	-4.45041	1.54e-05	0.000159	2.48389	Down-Regulated
FCGR3B	-1.69338	4.40432	-4.44933	1.54e-05	0.00016	2.4796	Down-Regulated
ITGA7	-1.32431	6.49785	-4.44495	1.57e-05	0.000162	2.46223	Down-Regulated
KLHL30	-1.08818	1.56498	-4.43442	1.64e-05	0.000168	2.42061	Down-Regulated
LOC389634	-1.06535	3.05638	-4.43258	1.65e-05	0.000169	2.41334	Down-Regulated
PTGIR	-1.27466	6.4189	-4.43238	1.66e-05	0.000169	2.41253	Down-Regulated
AFAP1	-1.12982	5.13232	-4.42626	1.7e-05	0.000172	2.38837	Down-Regulated
CD163L1	-1.20056	2.89866	-4.41776	1.76e-05	0.000177	2.35488	Down-Regulated
NR4A2	-1.22146	9.24576	-4.41387	1.79e-05	0.000179	2.33957	Down-Regulated
HLA-DRB5	-1.45371	9.02301	-4.40001	1.89e-05	0.000188	2.28507	Down-Regulated
PKIB	-1.34945	3.97855	-4.39824	1.91e-05	0.000189	2.2781	Down-Regulated
AGPAT9	-1.40421	6.99416	-4.39656	1.92e-05	0.00019	2.2715	Down-Regulated
SETBP1	-1.344	7.26676	-4.38932	1.98e-05	0.000195	2.24309	Down-Regulated
FLRT2	-1.1968	2.24549	-4.37424	2.11e-05	0.000206	2.18409	Down-Regulated
KCNA3	-1.00752	8.02688	-4.36574	2.18e-05	0.000213	2.15088	Down-Regulated
CLEC3B	-1.01917	3.34234	-4.36324	2.2e-05	0.000214	2.14115	Down-Regulated
UPK3A	-1.05696	1.45933	-4.35938	2.24e-05	0.000217	2.12607	Down-Regulated
PLVAP	-1.21529	4.63156	-4.34532	2.37e-05	0.000228	2.07135	Down-Regulated
GPX8	-1.13147	1.89168	-4.34359	2.39e-05	0.000229	2.06462	Down-Regulated
KITLG	-1.19156	4.48192	-4.33754	2.45e-05	0.000234	2.04112	Down-Regulated
GZMK	-1.00595	5.76022	-4.30503	2.8e-05	0.00026	1.91527	Down-Regulated
FCRLA	-1.04424	5.6327	-4.3034	2.82e-05	0.000262	1.90897	Down-Regulated
S100P	-1.56445	5.24398	-4.29169	2.95e-05	0.000272	1.86387	Down-Regulated
KDR	-1.37273	2.84044	-4.28751	3.01e-05	0.000276	1.84779	Down-Regulated
PECR	-1.23464	4.24013	-4.28464	3.04e-05	0.000279	1.83674	Down-Regulated
ARHGEF11	-1.3107	8.78951	-4.27608	3.15e-05	0.000287	1.80387	Down-Regulated
NHSL2	-1.12858	8.45572	-4.25735	3.4e-05	0.000307	1.73209	Down-Regulated
MFSD7	-1.03008	5.43688	-4.25476	3.43e-05	0.000309	1.7222	Down-Regulated
KCNC3	-1.4686	5.29728	-4.23094	3.78e-05	0.000337	1.63135	Down-Regulated
C7	-1.62106	3.83312	-4.22553	3.86e-05	0.000343	1.61078	Down-Regulated
C6orf97	-1.32276	4.03385	-4.2229	3.9e-05	0.000346	1.60077	Down-Regulated
LONRF3	-1.09096	5.93261	-4.2146	4.03e-05	0.000356	1.56925	Down-Regulated
IL33	-1.21452	2.06049	-4.21308	4.06e-05	0.000358	1.56348	Down-Regulated
IGJ	-1.05713	10.2232	-4.2035	4.22e-05	0.000369	1.52718	Down-Regulated
TRPC6	-1.07391	1.59026	-4.20248	4.24e-05	0.00037	1.52333	Down-Regulated
FCRL5	-1.01126	7.04665	-4.18891	4.47e-05	0.000387	1.47205	Down-Regulated
SLC6A1	-1.01592	1.4045	-4.18671	4.51e-05	0.00039	1.46372	Down-Regulated
ITGA1	-1.1822	4.05263	-4.18547	4.53e-05	0.000392	1.45907	Down-Regulated
CHL1	-1.5446	3.99778	-4.1836	4.57e-05	0.000394	1.45199	Down-Regulated
NLGN4X	-1.12425	2.18215	-4.16735	4.87e-05	0.000416	1.3908	Down-Regulated
CCDC50	-1.16517	8.26865	-4.15851	5.05e-05	0.00043	1.35763	Down-Regulated
CETP	-1.47784	3.79146	-4.15658	5.09e-05	0.000432	1.35037	Down-Regulated
ORM1	-1.02672	2.04467	-4.14715	5.28e-05	0.000446	1.31504	Down-Regulated
WFS1	-1.17523	5.29083	-4.14633	5.3e-05	0.000447	1.31197	Down-Regulated
NR2F2	-1.24848	2.35992	-4.14344	5.36e-05	0.000452	1.30116	Down-Regulated
C17orf55	-1.64339	4.06877	-4.12409	5.79e-05	0.000482	1.22888	Down-Regulated
LRRC32	-1.16818	3.81087	-4.12267	5.82e-05	0.000485	1.22361	Down-Regulated
NTRK2	-1.35921	3.04005	-4.11193	6.07e-05	0.000503	1.18363	Down-Regulated
EMCN	-1.19616	2.00579	-4.10852	6.15e-05	0.000508	1.17097	Down-Regulated
AKAP12	-1.06235	4.74903	-4.09605	6.46e-05	0.000531	1.12469	Down-Regulated
ITGB5	-1.04263	5.93036	-4.09119	6.59e-05	0.000539	1.10667	Down-Regulated
MFSD2A	-1.01034	6.18652	-4.09012	6.61e-05	0.00054	1.10271	Down-Regulated
CP	-1.0336	6.15885	-4.08211	6.82e-05	0.000554	1.07309	Down-Regulated
CUX2	-1.44008	3.92944	-4.08116	6.85e-05	0.000555	1.06959	Down-Regulated
TMEM117	-1.00421	3.1573	-4.07477	7.02e-05	0.000568	1.04597	Down-Regulated
PCSK5	-1.06	3.96318	-4.06456	7.31e-05	0.000587	1.00833	Down-Regulated
LAMA4	-1.33311	2.87753	-4.05506	7.59e-05	0.000606	0.973367	Down-Regulated
VCAM1	-1.7598	4.80402	-4.0502	7.73e-05	0.000614	0.955507	Down-Regulated
NRG1	-1.15447	1.4913	-4.04704	7.83e-05	0.00062	0.943922	Down-Regulated
SVEP1	-1.40264	2.97967	-4.04459	7.9e-05	0.000624	0.934922	Down-Regulated
DHRS3	-1.09577	6.63039	-4.04281	7.96e-05	0.000628	0.928383	Down-Regulated
COBLL1	-1.17359	7.64254	-4.03356	8.25e-05	0.000649	0.894527	Down-Regulated
RND3	-1.03908	1.47904	-4.02383	8.57e-05	0.000669	0.858948	Down-Regulated
RGS1	-1.10315	7.51304	-4.01957	8.71e-05	0.000678	0.843403	Down-Regulated
RAB3IL1	-1.24824	4.52746	-4.01703	8.8e-05	0.000684	0.834105	Down-Regulated
PARVA	-1.11469	2.23251	-4.00458	9.23e-05	0.000712	0.788754	Down-Regulated
FEZ1	-1.1281	3.25015	-4.00346	9.27e-05	0.000715	0.784711	Down-Regulated
C17orf28	-1.08537	4.15088	-4.0002	9.39e-05	0.000722	0.772831	Down-Regulated
KIR3DX1	-1.13094	2.74581	-3.99915	9.43e-05	0.000724	0.769014	Down-Regulated
ST8SIA1	-1.00943	3.48513	-3.98521	9.95e-05	0.00076	0.718429	Down-Regulated
KCNA5	-1.30713	1.85025	-3.97763	0.000102	0.000777	0.690986	Down-Regulated
IGFBP3	-1.22342	4.84983	-3.96708	0.000107	0.000804	0.652853	Down-Regulated
IGFBP5	-1.70682	5.45957	-3.96304	0.000108	0.000815	0.638273	Down-Regulated
COL5A3	-1.03856	2.93178	-3.9624	0.000109	0.000817	0.635998	Down-Regulated
COL1A1	-1.65721	4.594	-3.95963	0.00011	0.000825	0.626007	Down-Regulated
BCAR1	-1.02042	2.30524	-3.95516	0.000112	0.000837	0.609897	Down-Regulated
PRKCDBP	-1.27802	2.48898	-3.9547	0.000112	0.000838	0.60824	Down-Regulated
SNAI2	-1.189	2.29772	-3.94992	0.000114	0.00085	0.591026	Down-Regulated
WLS	-1.34541	3.13963	-3.93955	0.000119	0.000877	0.553793	Down-Regulated
CCL18	-1.09564	1.88787	-3.92674	0.000124	0.000912	0.507865	Down-Regulated
BTNL9	-1.10192	3.32772	-3.91895	0.000128	0.000935	0.480015	Down-Regulated
COL6A3	-1.40903	5.19122	-3.91541	0.00013	0.000945	0.467354	Down-Regulated
HLA-DQB2	-1.29188	3.31531	-3.91417	0.000131	0.000949	0.462942	Down-Regulated
MMRN2	-1.05778	3.18835	-3.91332	0.000131	0.000952	0.459892	Down-Regulated
S100A10	-1.09941	9.8004	-3.91211	0.000132	0.000954	0.455579	Down-Regulated
PLA2G16	-1.27573	4.81518	-3.91048	0.000132	0.000959	0.449752	Down-Regulated
PCDH17	-1.01869	1.82671	-3.89866	0.000138	0.000997	0.407641	Down-Regulated
EDNRB	-1.08307	2.69823	-3.89252	0.000142	0.001016	0.385812	Down-Regulated
FCGBP	-1.08238	5.7764	-3.89029	0.000143	0.001023	0.377893	Down-Regulated
SYT17	-1.21718	3.57944	-3.8619	0.000159	0.001121	0.277398	Down-Regulated
SDC2	-1.34622	2.85139	-3.85074	0.000166	0.001162	0.238025	Down-Regulated
TRNP1	-1.00715	2.4869	-3.84664	0.000169	0.001177	0.223601	Down-Regulated
BPI	-1.79989	5.97297	-3.84151	0.000172	0.001195	0.205583	Down-Regulated
TF	-1.15342	5.05276	-3.83425	0.000177	0.001222	0.180073	Down-Regulated
VENTX	-1.53499	4.97303	-3.83327	0.000177	0.001225	0.176646	Down-Regulated
ISLR	-1.15724	2.42329	-3.83208	0.000178	0.00123	0.172459	Down-Regulated
GHR	-1.08235	2.45665	-3.82831	0.00018	0.001241	0.159234	Down-Regulated
EMR4P	-1.3948	5.57221	-3.82533	0.000183	0.001255	0.14883	Down-Regulated
G0S2	-1.29576	3.95085	-3.81873	0.000187	0.001279	0.125715	Down-Regulated
TGM2	-1.13528	6.61535	-3.81617	0.000189	0.001289	0.116757	Down-Regulated
C1QTNF1	-1.16204	2.79678	-3.81376	0.000191	0.001299	0.108351	Down-Regulated
TRPS1	-1.16449	8.5529	-3.80628	0.000196	0.001327	0.082235	Down-Regulated
MXRA5	-1.50031	3.37312	-3.80363	0.000198	0.001338	0.073019	Down-Regulated
SLC22A3	-1.13833	3.51742	-3.79984	0.000201	0.001353	0.059792	Down-Regulated
GABBR1	-1.2118	8.67604	-3.79921	0.000201	0.001356	0.057595	Down-Regulated
LGI2	-1.09341	3.28137	-3.78502	0.000212	0.001412	0.008293	Down-Regulated
DES	-1.27865	2.03396	-3.78188	0.000215	0.001424	-0.0026	Down-Regulated
GNG12	-1.1352	2.78087	-3.78057	0.000216	0.001431	-0.00717	Down-Regulated
RTN1	-1.33579	4.13349	-3.75676	0.000235	0.001537	-0.08949	Down-Regulated
CDH11	-1.47524	3.49201	-3.75154	0.00024	0.001559	-0.10747	Down-Regulated
MYO10	-1.1055	3.94039	-3.7381	0.000252	0.001627	-0.15371	Down-Regulated
EFEMP1	-1.15396	1.95939	-3.72802	0.000262	0.001678	-0.18829	Down-Regulated
PPARG	-1.55393	4.19926	-3.70136	0.000289	0.001826	-0.27935	Down-Regulated
PPFIA4	-1.10625	5.10425	-3.69683	0.000293	0.001852	-0.29478	Down-Regulated
TIMP4	-1.0885	2.71833	-3.69503	0.000295	0.001862	-0.30088	Down-Regulated
PPAP2B	-1.04697	5.22689	-3.66739	0.000326	0.002028	-0.39458	Down-Regulated
TBC1D12	-1.13956	4.64677	-3.66617	0.000328	0.002035	-0.3987	Down-Regulated
NFIB	-1.2795	3.04552	-3.66256	0.000332	0.002056	-0.41087	Down-Regulated
FMO3	-1.17681	2.5324	-3.65904	0.000336	0.002079	-0.42275	Down-Regulated
C2	-1.59836	5.86636	-3.65806	0.000338	0.002085	-0.42608	Down-Regulated
ANKRD22	-1.10047	5.36368	-3.65617	0.00034	0.002097	-0.43244	Down-Regulated
LIMCH1	-1.17276	2.80836	-3.65143	0.000346	0.002125	-0.44842	Down-Regulated
MT1E	-1.13102	3.47438	-3.64835	0.00035	0.002144	-0.45879	Down-Regulated
FMO2	-1.34217	3.27409	-3.64291	0.000357	0.00218	-0.47704	Down-Regulated
KIF26B	-1.03262	6.88685	-3.63852	0.000362	0.002209	-0.49179	Down-Regulated
LUM	-1.40275	4.20852	-3.60101	0.000415	0.002463	-0.61712	Down-Regulated
S100A16	-1.52886	3.46223	-3.59154	0.000429	0.002536	-0.6486	Down-Regulated
TSPAN7	-1.73913	5.32843	-3.58051	0.000446	0.002618	-0.68517	Down-Regulated
SEMA6D	-1.12587	2.63161	-3.57615	0.000453	0.00265	-0.69959	Down-Regulated
DCN	-1.47403	4.03767	-3.57029	0.000463	0.002693	-0.71893	Down-Regulated
COL4A2	-1.22957	3.51248	-3.56175	0.000477	0.002764	-0.74711	Down-Regulated
SERINC2	-1.2452	5.4345	-3.56074	0.000478	0.002769	-0.75045	Down-Regulated
ABCC9	-1.07646	2.50041	-3.52876	0.000536	0.003052	-0.85538	Down-Regulated
BASP1	-1.18281	8.10998	-3.52296	0.000547	0.003102	-0.87434	Down-Regulated
STAB1	-1.50182	12.094	-3.51162	0.000569	0.003205	-0.91129	Down-Regulated
HS3ST1	-1.10133	3.12527	-3.50419	0.000584	0.003274	-0.93546	Down-Regulated
IGFBP4	-1.04351	6.29114	-3.45838	0.000685	0.00374	-1.08348	Down-Regulated
VGLL3	-1.30721	3.33134	-3.43887	0.000733	0.003959	-1.14598	Down-Regulated
CLEC5A	-1.39002	7.68995	-3.43308	0.000748	0.004024	-1.16448	Down-Regulated
SEMA3C	-1.36493	3.46193	-3.40972	0.00081	0.004282	-1.23884	Down-Regulated
SDC1	-1.01672	5.63938	-3.40234	0.000831	0.004377	-1.26223	Down-Regulated
ZNF532	-1.0267	6.70167	-3.37816	0.000903	0.004687	-1.33856	Down-Regulated
MMP17	-1.03733	6.17325	-3.36861	0.000933	0.004807	-1.36858	Down-Regulated
CFI	-1.08277	2.57486	-3.36741	0.000936	0.00482	-1.37235	Down-Regulated
SPRED1	-1.25742	5.31204	-3.35633	0.000972	0.004979	-1.40707	Down-Regulated
PTGFR	-1.32057	3.06127	-3.3556	0.000975	0.00499	-1.40937	Down-Regulated
KCNK10	-1.17461	1.82168	-3.30079	0.001172	0.005819	-1.57962	Down-Regulated
LCN2	-1.18217	3.21001	-3.27813	0.001265	0.006187	-1.6493	Down-Regulated
APLNR	-1.11274	2.898	-3.27135	0.001293	0.006305	-1.67009	Down-Regulated
MMP14	-1.24212	6.5351	-3.23579	0.001455	0.006927	-1.77835	Down-Regulated
KRT23	-1.14611	2.11405	-3.19784	0.001648	0.007683	-1.89277	Down-Regulated
CLEC4D	-1.31712	4.50234	-3.16181	0.001854	0.008493	-2.0003	Down-Regulated
SERPINB10	-1.20597	6.21761	-3.14266	0.001972	0.008905	-2.057	Down-Regulated
ADAMTS5	-1.08856	2.89438	-3.10617	0.002218	0.009779	-2.16419	Down-Regulated
MECOM	-1.3421	2.23298	-3.10062	0.002257	0.009921	-2.18041	Down-Regulated
BGN	-1.23112	3.96494	-3.08937	0.00234	0.01024	-2.21316	Down-Regulated
GJA1	-1.29405	3.76308	-3.08268	0.00239	0.01041	-2.2326	Down-Regulated
OLIG1	-1.0359	6.65678	-3.06693	0.002513	0.010846	-2.27821	Down-Regulated
GLDN	-1.04846	3.96436	-3.06688	0.002513	0.010846	-2.27835	Down-Regulated
PTPRM	-1.29785	5.83756	-3.06461	0.002531	0.010913	-2.28492	Down-Regulated
TDRD9	-1.36938	5.52195	-3.06327	0.002542	0.010953	-2.28879	Down-Regulated
TSHZ3	-1.02298	6.1979	-3.04057	0.002731	0.011627	-2.35408	Down-Regulated
MGAM	-1.09549	6.4685	-3.0278	0.002843	0.012007	-2.39064	Down-Regulated
VNN1	-1.39671	7.99301	-3.02054	0.002908	0.012217	-2.41135	Down-Regulated
ITGB3	-1.17192	7.2005	-3.01027	0.003003	0.012548	-2.44058	Down-Regulated
LBP	-1.07369	2.36708	-3.00365	0.003066	0.01276	-2.45937	Down-Regulated
THY1	-1.11636	3.51888	-2.98472	0.003252	0.013418	-2.51289	Down-Regulated
FSTL1	-1.09341	6.39603	-2.98129	0.003287	0.013537	-2.52256	Down-Regulated
MMP9	-1.22009	4.30026	-2.96002	0.003511	0.014269	-2.58229	Down-Regulated
PF4	-1.20485	4.21252	-2.92345	0.003928	0.015686	-2.68406	Down-Regulated
KIRREL	-1.23147	3.45551	-2.91768	0.003998	0.015902	-2.70003	Down-Regulated
FBN2	-1.20622	7.12361	-2.91506	0.00403	0.016012	-2.70726	Down-Regulated
ADAMTS2	-1.44464	4.8475	-2.89284	0.004312	0.01692	-2.76839	Down-Regulated
CD276	-1.02855	5.30355	-2.87972	0.004487	0.017495	-2.80427	Down-Regulated
LTF	-1.58857	5.33453	-2.84537	0.004975	0.019024	-2.89753	Down-Regulated
FBLN2	-1.09412	4.35161	-2.78376	0.005975	0.022074	-3.06226	Down-Regulated
HNMT	-1.09643	6.40515	-2.78228	0.006001	0.022147	-3.06618	Down-Regulated
ENPEP	-1.07963	3.18028	-2.76988	0.006224	0.022814	-3.09894	Down-Regulated
MMP8	-1.33741	5.26885	-2.76165	0.006376	0.023205	-3.12058	Down-Regulated
CDH1	-1.00801	4.66411	-2.72517	0.007092	0.025311	-3.21588	Down-Regulated
PACSIN1	-1.14408	4.30494	-2.6973	0.007687	0.026851	-3.28788	Down-Regulated
TMEM56	-1.05034	5.76288	-2.67813	0.008122	0.028047	-3.33704	Down-Regulated
CHRDL1	-1.31065	4.47847	-2.67616	0.008168	0.028158	-3.34206	Down-Regulated
COBL	-1.07614	2.15929	-2.65688	0.00863	0.029498	-3.39113	Down-Regulated
RETN	-1.22579	4.26774	-2.65185	0.008754	0.029824	-3.40388	Down-Regulated
LIFR	-1.05489	4.2985	-2.64769	0.008858	0.030134	-3.41441	Down-Regulated
TMEM105	-1.07518	3.45099	-2.5875	0.010494	0.034625	-3.56497	Down-Regulated
CEACAM8	-1.06752	4.32459	-2.5735	0.010911	0.035733	-3.59955	Down-Regulated
SCUBE1	-1.09107	6.27477	-2.56519	0.011166	0.036347	-3.61998	Down-Regulated
OLFML2A	-1.00041	6.7285	-2.55859	0.011372	0.036901	-3.63617	Down-Regulated
DUSP27	-1.17118	4.45195	-2.49154	0.013667	0.042739	-3.79841	Down-Regulated
